## Innate receptors with high specificity for HLA class I–peptide complexes

Malcolm J. W. Sim<sup>1</sup>#, Paul Brennan<sup>1</sup>, Katherine L. Wahl<sup>1</sup>, Jinghua Lu<sup>1</sup>, Sumati Rajagopalan<sup>1</sup>, Peter D. Sun<sup>1</sup> and Eric O. Long<sup>1</sup>\*

<sup>1</sup>Laboratory of Immunogenetics, National Institute of Allergy and Infectious Diseases, NIH, Rockville, MD 20852

\*Correspondence: Malcolm J. W. Sim ([malcolm.sim@ndm.ox.ac.uk](mailto:malcolm.sim@ndm.ox.ac.uk)), Eric O. Long ([elong@nih.gov](mailto:elong@nih.gov))

#Current address: Nuffield Department of Medicine, University of Oxford, Headington, United Kingdom.

## Summary

Genetic studies associate killer-cell immunoglobulin-like receptors (KIR) and their HLA class I ligands with a variety of human diseases. The basis for these associations, and the relative contribution of inhibitory and activating KIR to NK cell responses are unclear. As KIR binding to HLA-I is peptide-dependent, we performed systematic screens totaling over 3,500 specific interactions to determine the specificity of five KIR for peptides presented by four HLA-C ligands. Inhibitory KIR2DL1 was largely peptide sequence agnostic, binding approximately 60% of hundreds of HLA-peptide complexes tested. Inhibitory KIR2DL2, KIR2DL3, and activating KIR2DS1 and KIR2DS4 bound only 10%, down to 1% of HLA-peptide complexes tested, respectively. Activating KIR2DS1, previously described as weak, had high binding affinity for HLA-C with high peptide sequence specificity. Our data revealed MHC-restricted peptide recognition by germ-line encoded NK receptors and imply that NK cell responses can be shaped by HLA-I bound immunopeptidomes in the context of disease or infection.

## 1 Introduction

2 Susceptibility and severity of human diseases are influenced by highly variable genes of the  
3 immune system, exemplified by the classical class I human leukocyte antigens (HLA-I)<sup>1</sup>.  
4 Classical HLA-I molecules (HLA-A, -B and -C) present short peptide antigens that lie in the  
5 peptide binding groove (PBG) for immunosurveillance by T cells<sup>2</sup>. Peptides presented by  
6 these HLA-I molecules are collectively known as the immunopeptidome and as most HLA-I  
7 polymorphism is focused in the PBG, immunopeptidomes are highly diverse and differ  
8 between HLA-I molecules<sup>3</sup>. T cell receptors (TCR) detect peptide antigens with exquisite  
9 specificity, distinguishing antigens by single amino acid changes and differentiating 'self'  
10 from 'non-self' antigens<sup>2</sup>. However, peptide-specific recognition of HLA molecules is not  
11 limited to TCRs, as several studies identified germline-encoded receptors expressed on  
12 natural killer (NK) cells that also exhibit peptide-specificity<sup>4, 5, 6, 7, 8</sup>. These receptors include  
13 members of the killer-cell immunoglobulin-like receptor (KIR) family. In the case of KIR, this  
14 peptide-specific recognition contrasts with other innate receptors that bind outside the PBG  
15 and do not sense peptide sequence directly, such as CD8, ILT2 and the Ly49 receptors<sup>9, 10</sup>.  
16 <sup>11</sup>.

17 KIRs are encoded in a multigene family of activating and inhibitory receptors that play a  
18 dominant role in regulating natural killer (NK) cell function<sup>12, 13</sup>. KIRs bind HLA-I towards the  
19 C-terminal end of the bound peptide, with positions 7 (p7) and p8 of nonamer peptides being  
20 most critical for binding<sup>14, 15, 16</sup>. Like their HLA-I ligands, the KIR exhibit considerable allelic  
21 polymorphism, in addition to variation in haplotype, copy number, and gene content<sup>12, 17, 18</sup>.  
22 Of the 13 KIR genes, six encode HLA-C binding receptors, which are the inhibitory receptors  
23 KIR2DL1, KIR2DL2/3, and the activating receptors KIR2DS1, KIR2DS2, KIR2DS4, and  
24 KIR2DS5. HLA-C allotypes form two groups, C1 and C2, based on a pair of dimorphic amino  
25 acids at positions 77 and 80 that play a central role in determining KIR specificity<sup>19</sup>. C1-HLA-  
26 C allotypes (Ser 77, Asn 80) form ligands for the inhibitory receptor allelic pair KIR2DL2/3,  
27 while C2-HLA-C allotypes (Asn 77, Lys 80) are ligands for inhibitory receptor KIR2DL1<sup>19, 20</sup>.  
28 Activating receptor KIR2DS1, closely related to KIR2DL1 by sequence, also binds C2-HLA-

29 C, but with lower avidity<sup>21, 22</sup>. KIR2DS2 displays no binding to C1-HLA-C on cells but binds  
30 C1-HLA-C in the presence of specific peptides, including an epitope conserved in  
31 Flaviviruses<sup>20, 23</sup>. KIR2DS4 has an unusual HLA-I specificity, as it binds a subset of C1 and  
32 C2-HLA-C allotypes, as well as HLA-A\*11<sup>24</sup>. We recently demonstrated that recognition of  
33 HLA-C by KIR2DS4 has a high degree of peptide specificity, and that strong ligands include  
34 an epitope conserved in bacteria<sup>4</sup>. One KIR2DS5 allotype (KIR2DS5\*006) displayed binding  
35 similar to that of KIR2DS1, binding all C2-HLA-C allotypes with a lower avidity than  
36 KIR2DL1<sup>25</sup>.

37 The different inhibitory and activating KIR share considerable sequence similarity, bind  
38 seemingly analogous ligands, and play a role in regulating NK cell functions. Many studies  
39 have linked combinations of specific KIR and HLA-C ligands with human diseases<sup>17, 26, 27</sup>.  
40 Homozygosity of both C1-HLA-C and 2DL3 is associated with spontaneous resolution of  
41 Hepatitis C Virus (HCV)<sup>28, 29</sup>. Increased risk of pre-eclampsia and low birth weight are  
42 associated with pregnancies where the mother carries 2DL1 and the fetus carries its ligand  
43 C2-HLA-C<sup>30, 31</sup>. KIR and HLA-C combinations are also associated with susceptibility to  
44 autoimmune diseases and the success of hematopoietic stem cell transplantation for treating  
45 leukemia<sup>32, 33, 34</sup>.

46 Understanding these associations requires the identification of features that differentiate  
47 one KIR-HLA-C interaction from another. Presently, most KIR-HLA-C disease associations  
48 are interpreted through the 'strength of inhibition' hypothesis<sup>12, 26, 27</sup>. Under this framework,  
49 combinations of different KIR haplotypes and presence or absence of specific HLA ligands,  
50 generate a hierarchy of NK cell functional states with different predispositions to activation or  
51 inhibition. Dominating this hypothesis is the proposition that KIR2DL1-C2 is a stronger  
52 interaction than KIR2DL3-C1. Accordingly, 2DL3-C1-HLA-C confers weaker inhibition of NK  
53 cell activation, thus allowing NK responses against chronic HCV<sup>28, 29</sup>. Conversely, 2DL1-C2-  
54 HLA-C interactions strongly inhibit uterine NK cell activation, thus limiting the NK-dependent  
55 transformation of maternal spiral arteries, leading to pre-eclampsia<sup>26, 30</sup>. The evidence for this  
56 model relies on the superior binding of recombinant KIR2DL1-Ig fusion proteins (KIR2DL1-

57 Fc) to C2-HLA-C+ cells compared to KIR2DL2-Fc and KIR2DL3-Fc binding to C1-HLA-C+  
58 cells<sup>20</sup>. KIR2DL2 and KIR2DL3 are allotypes and both bind to C1-HLA-C, but KIR2DL2 binds  
59 with higher avidity<sup>20, 35</sup>. However, direct affinity measurements of KIR revealed that KIR2DL1,  
60 KIR2DL2, and KIR2DL3 have similar affinities for their respective ligands, suggesting that  
61 these receptors are not intrinsically stronger or weaker than one another<sup>21, 36, 37, 38, 39</sup>. A major  
62 difference between these two approaches that measure the strength of KIR-HLA-C  
63 interactions is that BIAcore measurements of affinity use recombinant HLA-C, refolded with  
64 specific peptides known to bind KIR. In contrast, KIR-Fc based measurements of avidity  
65 used HLA-C expressed on cells or cell-derived HLA-C coupled to beads and therefore  
66 binding occurred in the presence of a diverse HLA-C bound immunopeptidome<sup>40, 41</sup>.

67 We have proposed earlier that KIR2DL1 and KIR2DL2/3 exhibit fundamental differences  
68 in peptide selectivity, which may provide a better explanation for differences in KIR-Fc  
69 binding avidity<sup>14</sup>. Furthermore, we and others showed that activating KIRs have a high  
70 degree of peptide specificity and bind peptide ligands conserved in pathogens<sup>4, 23</sup>. Despite  
71 the clear contribution of peptide to KIR binding, direct comparisons of KIR peptide  
72 specificities have not been performed. Here, we examined the specificity of KIR2DL1,  
73 KIR2DL2, KIR2DL3, KIR2DS1, and KIR2DS4 for HLA-C peptide complexes in  
74 unprecedented detail using systematic screens to study hundreds of different peptide  
75 sequences in the context of both C1 and C2-HLA-C allotypes. Two pairs of C1 and C2 HLA-  
76 C with identical sequence, but for amino acids 77 and 80, were chosen to directly compare  
77 C1 and C2 allotypes loaded with the same peptides. Our data demonstrate that all these  
78 KIR2D are highly peptide sequence specific, except for KIR2DL1 in the context of C2, which  
79 is largely sequence agnostic. We categorically show that KIR previously defined as ‘weak’,  
80 such as activating KIR, are in fact peptide specific and display HLA-C binding affinities  
81 similar to those of inhibitory KIR with optimal peptide ligands. Our data imply that  
82 interpretation of disease associations with KIR-HLA-C combinations must consider the  
83 degree of peptide specificity and the contribution of immunopeptidomes to NK-target cell  
84 interactions.

85 **Results**

86 **KIR2DL2 and KIR2DL3 are more restricted by peptide sequence than KIR2DL1 for**  
87 **binding to HLA-C**

88 For experiments with recombinant proteins or KIR reporter cell lines, we used the common  
89 KIR allotypes KIR2DL1\*003 (2DL1), KIR2DL2\*001 (2DL2), KIR2DL3\*001 (2DL3),  
90 KIR2DS1\*001 (2DS1) and KIR2DS4\*001 (2DS4). We examined KIR binding to peptide  
91 libraries loaded onto single HLA-C allotypes expressed in cells deficient in transporter  
92 associated with antigen presentation (TAP). To directly compare the specificities of 2DL1,  
93 2DL2, and 2DL3 for the same peptides, we used pairs of HLA-C allotypes that differ only by  
94 the C1/C2 dimorphism (positions 77 and 80). The same peptides bind to the C1/C2 pair  
95 HLA-C\*08:02 and HLA-C\*05:01, provided they contain canonical anchor residues<sup>14, 42</sup>. Here,  
96 we have also used the C1/C2 pair HLA-C\*16:01 and HLA-C\*16:02. A comprehensive  
97 peptide library based on the 'self' 9mer peptide P2 (IIDKSGSIV) was generated where  
98 every amino acid combination at position 7 (p7) and p8 of 9mer peptides was included,  
99 barring cysteine, totaling 361 peptides (Fig. 1A). Peptide P2 was previously identified from  
100 immunopeptidomes of HLA-C\*05:01 (C\*05) and HLA-C\*08:02 (C\*08) in multiple studies<sup>14, 40,</sup>  
101 <sup>41</sup>, and conferred canonical 2DL1 binding to the C2 C\*05 and 2DL2 and 2DL3 (2DL2/3)  
102 binding to the C1 C\*08<sup>14</sup>. All peptides were tested at least twice, with high concordance  
103 between experiments (SFig. 1A). Acidic residues (Glu and Asp) at p7 and p8 were  
104 incompatible with KIR binding, consistent with previous studies<sup>14, 15, 43</sup>. The 2DL1-C\*05  
105 interaction was largely sequence agnostic, with the majority of p7p8 combinations supporting  
106 strong KIR binding (Fig. 1A). In sharp contrast, the 2DL2/3-C\*08 interaction was more  
107 sensitive to peptide sequence, as most p7p8 combinations proved incompatible with binding  
108 (Fig 1A, SFig. 1B). 2DL2/3 binding to C\*08 required specific p7p8 combinations, dominated  
109 by peptides with p8 Ala, Pro, Thr and Ser (Fig. 1A, SFig. 1B). Peptides compatible with  
110 2DL2/3 binding to C\*08 were a subset of those that conferred 2DL1 binding to C\*05 (Fig.  
111 1B). 2DL2 and 2DL3 displayed near-identical peptide-specificity (Fig. 1C), but 2DL2 binding  
112 avidity was stronger than that of 2DL3, consistent with earlier studies<sup>14, 20, 35, 43</sup>.

113 To define the biochemical properties of peptides that bind KIR, we conducted regression  
114 analysis of KIR binding correlated with numerical indices of amino acid size (mass),  
115 hydrophobicity (hydropathy index)<sup>44</sup> and isoelectric point (pI)<sup>45</sup> for amino acids at p7, p8 and  
116 p7p8 combined (Fig. 1D-F, SFig. 1C). In general, KIR binding peptides were hydrophobic,  
117 and had small side chains and a neutral isoelectric point at p7p8 (Fig. 1D-F, SFig. 1C). The  
118 2DL2-C\*08 interaction differed from 2DL1-C\*05 by a stronger sensitivity to peptide size,  
119 especially at p8, whereas the 2DL1-C\*05 interaction favored peptides with hydrophobic  
120 amino acids (Fig. 1A, D-F, SFig. 1C).

121 To explore the generality of our findings in the context of other HLA-C allotypes we  
122 generated TAP-deficient cells expressing HLA-C\*16:01 (C1) and HLA-C\*16:02 (C2) (SFig.  
123 1D,E). As for C\*08:02 and C\*05:01, this pair of HLA-C allotypes differs only by the two  
124 amino acids that define C1/C2 dimorphism. A panel of 19 'self' peptides derived from those  
125 previously eluted and sequenced from C\*16:01<sup>40</sup> were synthesized (SFig. 1E). They  
126 included every amino acid (except cysteine) at least once at p7 or p8. All peptides stabilized  
127 C\*16:01 and C\*16:02 to a similar extent (SFig. 1E). 2DL1 bound strongly to C\*16:02 in the  
128 presence of 13/19 peptides (Fig. 1G, SFig. 1F). In sharp contrast, strong 2DL2/3 binding to  
129 C\*16:01 was observed with only 1 peptide (P5) and much weaker binding was observed with  
130 12/19 peptides (Fig. 1G). Approximately 60% of peptides conferred 2DL1 binding to C\*05 or  
131 C\*16:02 with avidities at least half that obtained with the strongest binding peptide (Fig. 1H).  
132 In contrast, only 5-10% of peptides supported 2DL2/3 binding to C\*08:02 or C\*16:01,  
133 respectively, to within 50% of the highest binding peptides. Thus, 2DL1 and 2DL2/3 exhibit  
134 very different sensitivities to peptide sequence, with 2DL1 being more sequence agnostic,  
135 and 2DL2/3 being more peptide specific.

136

### 137 **Different peptide sequences dictate 2DL2/3 binding to C1 and crossreactive binding to** 138 **C2 HLA-C**

139 We next explored the capacity of inhibitory KIR to crossreact with non-canonical HLA-C  
140 ligands, namely 2DL1 with C1-HLA-C and 2DL2/3 with C2-HLA-C. Consistent with previous

141 studies<sup>14, 35</sup>, 2DL1 displayed exquisite specificity for C2-HLA-C, as only ArgThr at p7p8  
142 conferred 2DL1 binding to C\*08 (Fig. 2A, SFig. 2A, B). Crossreactive binding of 2DL2 and  
143 2DL3 with C\*05 (C2) was peptide sequence dependent, as it was with canonical binding to  
144 C\*08 (C1) (Fig. 2A). As observed with C\*08 (Fig. 1C), 2DL3 bound C\*05 with lower avidity  
145 than 2DL2 in the context of the same peptides (Fig. 2B). 2DL3 binding to weaker 2DL2  
146 ligands was very poor when presented by C\*05, but not C\*08 (Fig. 1C, 2B). Thus, the  
147 previously reported lack of C2-HLA-C recognition by 2DL3<sup>+</sup> NK cells<sup>35, 46</sup> may be due to a  
148 deficiency in 2DL3 to bind weaker 2DL2 ligands. Some p7p8 combinations, such as P2-LP  
149 (IIDKSGLPV), were good ligands for 2DL2/3 regardless of the C1/C2 status of the  
150 presenting HLA-C (Fig. 2C, D). However, many peptides were detected by 2DL2 selectively  
151 in the context of either C1 or C2 (Fig. 2C). For example, P2-QP was a better 2DL2/3 ligand  
152 when presented by C\*08 (C1), and P2-IQ was a better ligand when presented by C\*05 (C2)  
153 (Fig. 2C, D). This property was confirmed by cross-reactive 2DL2 binding to C\*16:02 (Fig.  
154 2E, F). P5 conferred strong binding to 2DL2 when presented by C\*16:01 (C1) but not  
155 C\*16:02 (C2), whereas P9 and P12 were much better 2DL2 ligands when presented by  
156 C\*16:02 (Fig. 2E, F). Thus, 2DL2 displays different preferences for peptide sequence when  
157 binding the nearly identical C1 or C2 HLA-C allotypes. Finally, the rare crossreactivity of  
158 2DL1 (Fig. 2A)<sup>14</sup> was confirmed, as none of the 19 peptides loaded onto C\*16:01 conferred  
159 2DL1 binding (SFig. 2C).

160

### 161 **High peptide specificity of KIR2DS4 binding to C1 and C2 HLA-C**

162 We recently identified P2-AW (IIDKSGAWV) and similar peptides as functional 2DS4 ligands  
163 when bound to C\*05<sup>4</sup>. To further dissect the specificity of 2DS4 for HLA-C, we generated a  
164 Jurkat reporter cell line expressing 2DS4 and the signaling adaptor DAP12 (Jurkat-2DS4)  
165 and screened the P2 p7p8 library. After loading onto C\*08 and C\*05, 2DS4 recognition of  
166 C\*08 and C\*05 was highly peptide-specific, as only 2/361 peptides bound to C\*08 and 7/361  
167 peptides bound to C\*05 conferred greater than half-maximal responses (Fig. 3A). 2DS4  
168 ligands were peptides with p8 Trp in specific combinations with p7. For C\*08, good



169 responses were seen with MetTrp and ArgTrp, and weaker responses with HisTrp, LeuTrp  
170 and IleTrp. Except for HisTrp, these peptides also triggered 2DS4 responses in the context  
171 of C\*05, but with a different hierarchy (Fig. 3A, B). Additional p7p8 combinations with C\*05  
172 triggered 2DS4-specific responses, such as AlaTrp and ValTrp. A p7 side chain was  
173 essential as P2-GW did not generate a 2DS4 ligand (Fig. 3A). Thus, 2DS4 binds C1 and C2  
174 HLA-C allotypes, and appeared more peptide-specific when binding C1, as compared to C2-  
175 HLA-C (Fig. 3A, B). These p8 Trp containing peptides were validated as 2DS4 ligands by  
176 two other assays, KIR-Fc binding and degranulation assays with primary 2DS4<sup>+</sup> NK cells,  
177 after loading onto C\*08 and C\*05 expressing cells (Fig. 3C-E, SFig. 3A-C). When presented  
178 by C\*05, many p7p8 combinations are 2DL1 ligands, including those that formed 2DS4  
179 ligands. In contrast, 2DS4 binding peptides presented by C\*08 were poor ligand for 2DL2  
180 (Fig 3F). Furthermore, two additional 2DS4 ligands were identified among peptides (P9 and  
181 P18) presented by C\*16:02 (Fig. 3G). 2DS4 binding to C\*16:01 was negative or very weak  
182 even in the context of peptides P9 and P18 (SFig. 3D).

183 We previously tested 2DS4-Fc binding to twelve C\*05 self-peptides that contained p8  
184 Trp and found 1 strong binder (SNDDKNAWF) derived from HECTD1<sub>1131-1139</sub>, demonstrating  
185 that 2DS4 ligands can include self-peptides<sup>4</sup>. This peptide has optimal p7p8 residues,  
186 however other self-peptides with optimal p7p8 sequences such as IleTrp did not bind 2DS4<sup>4</sup>.  
187 As this suggested that other residues influence 2DS4 binding, we examined the contribution  
188 of p6 to 2DS4 binding. Substitutions were introduced at p6 in peptide P2-MW (IIDKSxMWV),  
189 which is a strong ligand for 2DS4 when presented by C\*08 and C\*05 (Fig. 3B). In the context  
190 of peptide loaded C\*08, five p6 substitutions maintained greater than 50% of 2DS4 binding  
191 (Pro, Lys, Val, Leu, Ile) (Fig. 3H, SFig. 3G). In contrast, any deviation from p6 Gly decreased  
192 2DS4 binding to C\*05, with only p6 Asn conferring more than 25% of binding with p6 Gly  
193 (Fig. 3H, SFig. 3G). These data suggest that 2DS4 is more tolerant of variation at p6 when  
194 binding C1-HLA-C, but more tolerant of variation at p7 when binding C2-HLA-C (Fig. 3B).  
195 The strict preference at p6 for 2DS4 binding to C\*05 potentially explains why peptide

196 ISDLDTIWL (UPK3L1<sub>77-85</sub>) did not bind 2DS4 despite optimal p7p8 residues<sup>4</sup>, and further  
197 exemplifies the exquisite specificity of 2DS4.

198 Activating KIR were known as weak receptors, based on binding of KIR-Fc to HLA-C  
199 expressed on cells or to HLA-C proteins that had been cleaved from cells and bound to  
200 beads<sup>20, 22, 24, 47</sup>. Given our finding that 2DS4 is highly peptide-specific when binding HLA-C,  
201 it is possible that a weak avidity to cell-derived HLA-C was due to a paucity of HLA-C  
202 peptide complexes compatible with 2DS4 binding. To resolve this question, we determined  
203 the solution affinity of 2DS4 for C\*05 by surface plasmon resonance (SPR), using  
204 recombinant proteins refolded *in vitro*. 2DS4 bound C\*05 refolded with P2-AW  
205 (IIDKSGAWV) with low micromolar affinity ( $K_D = 2.0 \mu\text{M}$ ), but not C\*05 refolded with P2-IP  
206 (IIDKSGIPV) or P2-AV (IIDKSGAVV) (Fig. 3I, J). Thus, 2DS4 is a highly peptide specific  
207 receptor that binds C1 and C2 HLA-C with an affinity similar to that of inhibitory KIR (Table  
208 1).

209

#### 210 **Prediction of novel bacterial ligands for 2DS4**

211 Carrying full-length functional *KIR2DS4* is associated with decreased risk of preeclampsia  
212 and improved survival in glioblastoma patients, but confers faster progression to AIDS in HIV  
213 infected individuals<sup>48, 49, 50</sup>. As potential mechanisms for these associations remain unclear, it  
214 is critical to develop tools to identify potential 2DS4 epitopes that may contribute to disease.  
215 We previously identified a partially conserved 9mer sequence, in the bacterial protein  
216 Recombinase A (RecA) that generated a strong 2DS4 ligand when presented by C\*05<sup>4</sup>.  
217 These peptides were identified by a sequence alignment search of prokaryotic proteomes  
218 using P2-AW (IIDKSGAWV). Having defined the 2DS4 binding specificity in much greater  
219 detail (Fig. 3), we proceeded to search the UNIPROT database for other potential 2DS4  
220 ligands using the ScanProsite tool<sup>51</sup> (Fig. 4A). By scanning human, viral and bacterial  
221 proteomes with a 9mer search motif that incorporates optimal sequences for binding C\*05  
222 (p1-p5 and p9) and 2DS4 (p6-p8) (Fig. 4B), over 500 potential 2DS4 epitopes were identified  
223 in bacterial proteomes, as compared to approximately 100 and 50 potential epitopes in the

224 human and viral proteomes, respectively (Fig. 4B). The sequences and source proteins for  
225 all predicted 2DS4 epitopes can be found in Supp. Table 1. To validate whether the  
226 ScanProsite tool could identify functional 2DS4 epitopes, we focused on bacterial  
227 sequences, given their large number. As expected, our search returned many RecA  
228 sequences and the remaining were filtered for those conserved in *Escherichia coli* and other  
229 common human pathogens. The Rbba<sub>850-858</sub> (SLEGPGRWI) and Gudx<sub>231-240</sub> (TVDPNGAWL)  
230 peptides did not bind 2DS4-Fc or stimulate 2DS4+ NK cells, despite proper loading onto  
231 HLA-C (Fig. 4C,D). It is possible that other features besides the simple motif, such as Pro at  
232 p4 or p5 in the context of a given sequence, could be incompatible with 2DS4 recognition.  
233 The Ehab<sub>727-736</sub> peptide (LADNGGAWV) conferred weak 2DS4-Fc binding and elicited an  
234 intermediate response by primary 2DS4-SP NK cells, but only when presented by C\*05 and  
235 not C\*08 (Fig. 4C,D). This result is consistent with our data showing that AlaTrp at p7p8  
236 stimulated NK cells only when presented by C\*05 (Fig. 3). The TraQ<sub>11-19</sub> peptide  
237 (RLDITGMWV), found in several pathogenic bacterial species (Fig. 4E), was a strong  
238 stimulator of 2DS4-positive NK cells when presented by C\*08 and C\*05 (Fig. 4C,D), again  
239 consistent with our data showing that MetTrp at p7p8 was the best combination for binding  
240 2DS4 the context of both C\*08 and C\*05 (Fig. 3). TraQ is a chaperone-like component of the  
241 type IV secretion system, required for bacterial conjugation and horizontal gene transfer<sup>52</sup>.  
242 Thus, we have shown that predictions based on experimental data on KIR binding to HLA-C-  
243 peptide complexes can be used to identify good ligands for 2DS4, including sequences  
244 conserved in bacteria. Detection of pathogens by 2DS4+ NK cells could be relevant to the  
245 interpretation of HLA-C and 2DS4 association with disease.

246

#### 247 **High peptide specificity and strong binding of 2DS1 to C2 HLA-C**

248 Unlike 2DS2 and 2DS4, 2DS1 displays measurable binding to cell surface C2-HLA-C and to  
249 cell-derived C2-HLA-C bound to beads, with approximately 25-50% of the avidity measured  
250 with 2DL1<sup>21, 22, 47</sup>. Studies of approximately 20 peptides presented by C\*04:01 and C\*06:02  
251 showed that 2DS1 had a preference for peptide sequences similar to that of 2DL1, but

252 bound with lower avidity and affinity<sup>21, 53</sup>. To define the 2DS1 specificity for HLA-C-peptide  
253 complexes in greater depth, we used the reporter cell line BW3NG-NFAT-GFP-2DS1, which  
254 expresses GFP upon cell surface antibody crosslinking of 2DS1<sup>7</sup> and detection of peptide-  
255 HLA-C complexes (SFig. 4A, B). With the P2 peptide library loaded onto C\*05, only 5%  
256 (18/361) of peptides conferred greater than half-maximal 2DS1 responses, the highest being  
257 P2-VA, P2-LP, P2-IS, P2-IA, and P2-IP (Fig. 5A). Therefore, 2DS1 emerged as a peptide  
258 specific receptor, despite 96.9% protein sequence identity with the ectodomain of inhibitory  
259 KIR2DL1.

260 2DS1 bound exclusively to the subset of peptides that conferred greater than 75% of  
261 maximal 2DL1 binding (Fig. 5B). The top peptides for 2DS1 stimulation were also among  
262 those that promoted strong crossreactive binding of 2DL2 with C\*05 (Fig. 5B). However, the  
263 degree of peptide specificity of 2DS1-induced responses is greater than that of crossreactive  
264 2DL2 binding to the C2 allotype C\*05. To confirm results obtained with the 2DS1 reporter  
265 cell line, direct binding measurements were performed with soluble KIR-Fc. 2DS1-Fc binding  
266 to TAP-deficient, peptide-loaded C\*05<sup>+</sup> cells was indeed as strong as that of 2DL1-Fc in the  
267 context of P2-IP, P2-IA, and P2-IS (Fig. 5C, D). Consistent with our screen, 2DS1-Fc binding  
268 to P2-KS loaded C\*05 cells was much weaker than that of 2DL1-Fc (Fig. 5C, D). As a  
269 control, the P2-SE peptide did not support binding of either 2DL1 or 2DS1 to C\*05 (Fig. 5C,  
270 D).

271 Functional detection of C\*05 by 2DS1 was tested with primary resting NK cells. A gating  
272 strategy was used to identify single-positive 2DS1<sup>+</sup> (2DS1-SP) and NKG2A<sup>+</sup> (NKG2A-SP)  
273 NK cells, as well as NK cells that did not express any inhibitory KIR nor NKG2A (R-) (SFig.  
274 4B). Degranulation was measured after incubation with C\*05 cells loaded with peptides that  
275 conferred 2DS1-Fc binding. Note that NK cells are normally stimulated by 221 cells, unless  
276 221 expresses an HLA class I for which NK cells have an inhibitory KIR (e.g. C\*05 and  
277 KIR2DL1). Furthermore, a low response of R- cells was expected, as these NK cells are not  
278 licensed. Of the NKG2A-SP NK cells, which benefit from in vivo licensing through inhibitory  
279 receptor NKG2A binding to HLA-E, approximately 40%, up from 15%, degranulated (Fig.

280 5E). Remarkably, loading C\*05 on TAP-deficient 221 cells with peptides that provided a  
281 ligand for 2DS1 triggered much stronger degranulation, up to 70% of 2DS1-SP cells (Fig.  
282 5E). In the absence of peptide, or after loading P2-SE, degranulation by 2DS1-SP cells was  
283 no different from that of NKG2A-SP cells (Fig. 5E, SFig. 4B, C). We conclude that 2DS1 is a  
284 strong activating receptor, akin to 2DS4<sup>4</sup>, on primary, resting NK cells and that it endows NK  
285 cells with the ability to selectively target cells that have specific peptides presented by C\*05.  
286 Next, we examined whether the selective recognition of HLA-C-peptides by 2DS1 would  
287 apply to another C2 HLA-C allotype. Strong 2DS1-Fc binding to C\*16:02 on TAP-deficient  
288 221 cells was detected after loading 3/19 C\*16:01 'self' peptides, in contrast to 13/19  
289 peptides that displayed strong binding to 2DL1 (SFig. 4D,E).

290 The distinct binding properties of 2DS1 and 2DL1 were further examined in the context  
291 of the dimorphic residues 77 and 80 in HLA-C that distinguish C1 and C2 allotypes.  
292 Selective binding of 2DL1 to C2 HLA-C is dictated mainly by Lys80, which is accommodated  
293 by a 'pocket' in 2DL1<sup>19, 54</sup>. Accordingly, replacing Asn77 with Ser in C\*05:01 (mutant  
294 S77K80) had no effect on 2DL1-Fc binding (Fig. 5F). Conversely, no binding of 2DL1-Fc  
295 occurred with C\*08:02 (S77N80) nor with an Asn substitution of Lys80 in C\*05:01 (mutant  
296 N77N80). 2DS1-Fc binding to these cells was similar to that of 2DL1-Fc but for one striking  
297 difference. As with 2DL1-Fc, 2DS1-Fc did not bind to C\*08:02 nor to the N77N80 mutant,  
298 showing that 2DS1 shares the dependence on Lys80 (Fig. 5F). However, substitution of  
299 Asn77 with Ser77 (mutant S77K80) *improved* 2DS1-Fc binding (Fig. 5F). Ser77 is  
300 associated with the presentation of peptides with smaller residues at p8, as compared to  
301 Asn77<sup>42</sup>, and smaller p8 residues are favored by 2DL2/3 and 2DS1, which could explain the  
302 correlation between peptides favored by 2DS1 and 2DL2 (Fig. 5B).

303 The reported solution binding affinity ( $K_D$ ) of 2DL1 with HLA-C\*04:01 refolded with  
304 peptide QYDDAVYKL was 7.2  $\mu\text{M}^{21}$ . In the same study, 2DS1 displayed a lower affinity for  
305 the same HLA-C-peptide complex ( $K_D = 30 \mu\text{M}$ ), suggesting that 2DS1 is a weak receptor.  
306 Our work suggests that the peptide may not have been optimal for 2DS1 binding. We

307 therefore determined the solution binding affinity of 2DS1 for C\*05 with peptide ligands P2-IP  
308 and P2-AV, and the non-stimulating peptide P2-AW. Compared to 2DS4 (Fig. 3I), 2DS1 and  
309 2DL1 displayed stronger affinities, with slower dissociation rates when binding to the strong  
310 ligands P2-IP and P2-AV (Fig. 5G, H). For 2DL1 and 2DS1 binding to C\*05 refolded with P2-  
311 IP and P2-AV, we used kinetic curve fitting to analyze binding curves with KIR  
312 concentrations of 2.5  $\mu$ M, 5  $\mu$ M and 10  $\mu$ M. The affinities ( $K_D$ ) of 2DS1 for P2-IP and P2-AV  
313 were  $2.3 \pm 0.8 \mu$ M and  $2.6 \pm 0.2 \mu$ M respectively, compared to  $0.44 \pm 0.2 \mu$ M and  $1.00 \pm 0.1 \mu$ M,  
314 respectively, for 2DL1 (Table 1). The affinity of 2DL1 and 2DS1 for P2-AW was determined  
315 by equilibrium binding analysis (steady state) and revealed similar affinities of  $1.1 \pm 0.1 \mu$ M  
316 and  $1.9 \pm 0.2 \mu$ M, respectively (Fig. 5I,J). As binding affinities of 2DL1 and 2DS1 were in a  
317 similar range, 2DS1 is clearly not a weak receptor. Intriguingly, 2DS1 and 2DS4 bound  
318 C\*05-P2-AW with similar low micromolar affinities, despite P2-AW not being a functional  
319 ligand for 2DS1 (Fig. 4A) and being a potent ligand for 2DS4 (Fig. 3A, D). This suggests that  
320 these two activating receptors exhibit different affinity thresholds for receptor activation.  
321 Together, these data demonstrate that 2DS1 is not an intrinsically weaker receptor than  
322 2DL1, but a comparably strong binder to HLA-C loaded with peptides that confer high 2DS1  
323 specificity.

324

### 325 **A steep gradient of specificity for peptides presented by HLA-C distinguishes** 326 **members of the KIR2D family**

327 For a direct comparison of peptide specificity, we took advantage of peptides P9 and P18  
328 presented by C\*16:02, which promoted binding of all five KIR studied here. Starting with P9  
329 (SAYVKKIQF) and P18 (SATKYSRRL) backbones, we generated substitution libraries at p8  
330 with fixed p7, and at p7 with fixed p8. Substitutions were made to all other amino acids,  
331 except for Cys, Asp and Glu. For 2DL1-Fc binding to C\*16:02, only 20% of substitutions  
332 reduced binding to less than 25% of the binding to unmodified P9 or P18 (Fig. 6A-D). In  
333 contrast, approximately 70%, 55%, and 85% of substitutions reduced binding to that extent

334 for 2DL2/3-Fc, 2DS1-Fc, and 2DS4-Fc, respectively (Fig. 6A-D). Conversely, substitutions  
335 that increased binding were less frequent. For the two activating KIR-Fc, some substitutions  
336 lead to very large increases in binding (Fig. 6A-D). The Q8S substitution in P9 (SAYVKKISF)  
337 improved 2DS1 binding by approximately 5-fold, and the Q8W substitution in P9  
338 (SAYVKKIWF) improved 2DS4-Fc binding by approximately 90-fold.

339 The novel 2DS4 binding epitopes were validated functionally using degranulation assays  
340 with primary resting NK cells. Peptides that formed better binding sites when loaded onto  
341 C\*16:02 also stimulated strong degranulation by 2DS4-SP NK cells (SFig. 5). In addition, a  
342 few p7p8 substitutions in P9 and P18 improved 2DL2/3 binding to C\*16:01 (C1) (SFig. 6)  
343 and consistent with our data (Fig. 2), 2DL2/3 binding to canonical (C\*16:01) and  
344 crossreactive (C\*16:02) were optimized by different p7p8 combinations (SFig. 6C, D). These  
345 data further demonstrate the peptide specificity of 2DL2/3 in binding HLA-C.

346 In summary, the 2DL1-C2 interaction was most resistant to peptide sequence  
347 substitutions, while other KIR-HLA-C interactions were easily perturbed by sequence  
348 changes. In addition, peptide-specific interactions displayed by other KIR could be further  
349 optimized with specific amino acids. Thus, 2DL1-C2 differs categorically from other KIR-  
350 HLA-C interactions, which exhibit much greater peptide-specificity.

351

### 352 **KIR binding across HLA-C allotypes is dependent on peptide backbone**

353 We next compared KIR binding to different C2 HLA-C allotypes in the context of the same  
354 p7p8 peptide combinations: binding to C\*05 presenting p7p8 variants of P2 (IIDKSGxxV)  
355 compared with KIR binding to C\*16:02 presenting p7p8 variants of P9 (SAYVKKxxF) or P18  
356 (SATKYSxxL). Strong positive correlations for all five KIR (2DL1, 2DL2, 2DL3, 2DS1 and  
357 2DS4) were observed with C\*05 and C\*16:02, when C\*16:02 presented peptides with the P9  
358 backbone (Fig. 7A). Notably, p7p8 combinations IS and IW were strong ligands for 2DS1  
359 and 2DS4, respectively, in the context of C\*05-P2 and C\*16:02-P9. Remarkably, no such  
360 correlation occurred between C\*05 and C\*16:02 that presented peptides on the P18  
361 backbone (Fig. 7B). Similarly, 2DL2 binding to the same p7p8 combinations presented by

362 the C1 allotypes C\*08 and C\*16:01 showed a stronger correlation when C\*16:01 presented  
363 peptides on the P9 background than the P18 background (SFig 7). As p7p8 sequence alone  
364 cannot explain these correlations, the peptide-specificity of KIR must depend also on  
365 structural conformation of p7p8 residues determined by other amino acid positions.  
366



367 **Discussion**

368 KIR family members regulate NK cell responses, both positively and negatively, upon  
369 recognition of HLA-I ligands. The numerous associations of disease with the presence or  
370 absence of specific KIR-HLA-I ligand combinations imply that KIR interaction with HLA-I is  
371 not simply generic and that individual KIR members have unique properties. It is therefore  
372 crucial to identify salient features that differentiate one KIR-HLA-I interaction from another.  
373 We measured over 3,500 different KIR-peptide:HLA-C interactions and uncovered  
374 substantial differences in peptide-specificity among KIRs. Notably, 2DL1-C2-HLA-C was  
375 unique in being largely peptide agnostic, while four other KIR2D-HLA-C interactions had a  
376 sequence dependence ranging from highly selective to exquisitely specific. Furthermore,  
377 intrinsic KIR affinity for HLA-C is similar between inhibitory and activating KIR when tested in  
378 the presence of optimal peptides, and comparable to the affinity of NK activating receptors,  
379 such as 2B4 and NKG2D<sup>55, 56</sup>. Finally, we demonstrate that prediction of KIR ligands from  
380 HLA-I-associated peptide sequences is feasible, paving the way for tools that can analyze  
381 immunopeptidomes obtained from physiologically relevant tissue sites and identify KIR  
382 ligands that may contribute to disease associations.

383 Differences in peptide-specificity between KIR provide an explanation for the  
384 discrepancy observed between KIR binding affinity in solution and binding avidity to HLA-C  
385 expressing cells. As cell surface HLA-C presents a diverse immunopeptidome<sup>40, 41</sup>, the  
386 frequency of ligands for those KIR that are more peptide-specific is likely to be low, thus  
387 resulting in a reduced KIR binding avidity to cells. Thus, our data provide a new lens through  
388 which KIR-HLA-C disease associations can be understood, within the framework of the  
389 'Peptide-selectivity model'<sup>14</sup>. This model proposes that the difference between KIR2DL1-C2  
390 and KIR2DL2/3-C1 is mainly that KIR2DL2/3 are more peptide selective than KIR2DL1. Our  
391 current work strongly supports and expands this model, and raises new questions on the  
392 contribution of immunopeptidomes to NK cell responses.

393 Several studies have determined that peptides derived from viruses can be either  
394 compatible or incompatible with KIR binding<sup>57, 58, 59, 60, 61</sup>. Furthermore, virus infections can

395 significantly alter presentation of host cell-derived peptides<sup>62</sup>, which could alter interactions  
396 with KIR. Understanding how the immunopeptidome as a whole contributes to KIR binding,  
397 at both steady state and in disease, may reveal the molecular basis for associations with  
398 disease. In most cases of KIR associations with disease, the immunopeptidomes of potential  
399 NK cell targets, such as fetal extravillous trophoblast (EVT) cells or HCV-infected  
400 hepatocytes, are unknown. Our model predicts that in HCV infection, C1-HLA-C infected  
401 hepatocytes will present fewer KIR2DL3 ligands, thus conferring weaker KIR2DL3 binding  
402 and reduced NK cell inhibition. Conversely, given the promiscuity of KIR2DL1 binding to  
403 HLA-I-peptide complexes, immunopeptidomes of C2-HLA-C infected hepatocytes likely  
404 provide sufficient KIR2DL1 ligands to maintain NK cell inhibition.

405 Immunopeptidome studies will have to be paired with tools that accurately predict KIR  
406 ligands. As proof-of-concept, we scanned the UniProt database with the KIR2DS4 peptide  
407 binding motif identified here, combined with the sequence motif of 9mer peptides bound to  
408 HLA-C\*05:01, and identified several KIR2DS4 ligands in both human and pathogen protein  
409 sequences. Specifically, a sequence conserved in the bacterial protein TraQ was a potent  
410 functional ligand for KIR2DS4 when presented by HLA-C\*05:01 and the related C1 HLA-  
411 C\*08:02. The development of more sophisticated computational tools capable of predicting  
412 KIR ligands, analogous to MHC peptide binding prediction algorithms<sup>63</sup>, is needed, which will  
413 require more input data obtained from screens of similar design to those shown here. The  
414 relative contribution of KIR ligand abundance and of ligand affinity to functional NK cell  
415 responses has yet to be determined. To what extent signaling by KIR engaged with MHC-I  
416 can be modulated by co-activation and co-inhibition receptors, as is the case for TCRs<sup>64</sup>, is  
417 not clear. Understanding how NK cells integrate KIR signals with the many other signals they  
418 receive from target cells to mount a response could also be a key to parsing KIR-HLA  
419 association with disease.

420 KIR2DS1 is a C2-HLA-C binding receptor with weaker avidity than KIR2DL1<sup>21, 22</sup>. Our  
421 data demonstrate that this lower avidity for cell surface HLA-C is due to high peptide-  
422 specificity, not an intrinsically lower affinity. Primary resting KIR2DS1-single positive NK cells

423 were stimulated by peptide loaded target cells in a sequence specific manner, indicating that  
424 KIR2DS1+ NK cells can contribute to NK cell functional responses when proper ligands are  
425 presented. Carrying *KIR2DS1* is associated with protection from pre-eclampsia<sup>65</sup>, increased  
426 risk of psoriatic arthritis<sup>34</sup> and better survival in treatment of acute myeloid leukemia (AML)  
427 by haemopoietic stem cell transplantation<sup>32</sup>. Future work should define the  
428 immunopeptidomes of key cell types proposed to be targets for NK cells in these diseases,  
429 such as fetal EVT, keratinocytes, and AML blasts. Cognate KIR2DS1 ligands identified in  
430 such immunopeptidomes may provide molecular insight into disease association and expose  
431 potential therapeutic avenues.

432 The broad reactivity of KIR2DS4 with HLA-I allotypes<sup>24</sup>, unusual for a KIR, is best  
433 explained by high specificity for a peptide sequence that can be presented by multiple HLA-I  
434 allotypes. This could occur through a shared binding motif for KIR2DS4, such as IleTrp at  
435 p7p8, which formed a strong ligand on the peptide P2 backbone when presented by C\*05,  
436 and on the peptide P9 backbone presented by C\*16:02. In general, KIR recognition is not  
437 limited to p7p8 sequence alone, as the remaining peptide backbone contributed to binding of  
438 all KIRs tested, including KIR2DL1. This suggests that KIR recognition imposes both  
439 sequence and conformation specific constraints on its ligands, much like the TCR<sup>2, 66</sup>.  
440 Functional *KIR2DS4* is associated with numerous human diseases, notably with poor  
441 outcome in HIV infected individuals<sup>49, 67</sup>. While the mechanism for this association is  
442 unknown, it could be due to inflammation triggered by excessive NK cell activation<sup>67</sup>.  
443 Immunopeptidomes of HIV-infected and uninfected CD4 T cells may identify KIR2DS4  
444 ligands and provide insight into this disease association.

445 C2-HLA-C and KIR2DL1, present only in higher primates, are the result of more recent  
446 evolution than KIR that bind C1-HLA-C<sup>68</sup>. It is possible that peptide specificity by KIR pre-  
447 existed KIR2DL1. As a KIR more resistant to changes in peptide repertoire, KIR2DL1 could  
448 provide the advantage of a reliable inhibitory receptor that senses mainly HLA-C expression  
449 level. In this respect, KIR2DL1 is like the MHC-I specific Ly49 receptors in mice, which are  
450 peptide dependent, but only in so far as a requirement for stable MHC-I, independent of

451 peptide sequence<sup>69, 70</sup>. Activating KIR in chimpanzee have broad and strong MHC-I  
452 recognition<sup>47</sup>, indicative of peptide-agnostic recognition, with the exception of *KIR2DS4*,  
453 which is the only activating KIR shared with humans<sup>24</sup>. This suggests that *KIR2DS1* and  
454 *KIR2DS2* evolution in the human lineage generated greater peptide-specificity, perhaps to  
455 help combat infections<sup>71</sup>.

456 *KIR2DL2* and *KIR2DL3* are alleles of the same gene and exhibit near-identical peptide  
457 specificity and similar intrinsic affinities. However, KIR2DL2-Fc exhibits stronger binding  
458 avidity than KIR2DL3-Fc when binding to cells or to beads coated with peptide-HLA-C  
459 complexes. This is likely due to polymorphism in residues distal to the KIR binding site that  
460 are predicted to modify the hinge angle between the D1 and D2 Ig domains<sup>35</sup>. KIR2DL2 was  
461 also better than KIR2DL3 at cross-reactive binding with C2-HLA-C, not only due to the lower  
462 avidity of KIR2DL3 but also to an apparent deficit of KIR2DL3 in detection of weaker  
463 KIR2DL2 ligands<sup>35, 46</sup>. Remarkably, the peptide specificity of KIR2DL2 was different when  
464 binding to the same peptides presented by C1 or by C2-HLA-C. In addition to KIR2DL2 and  
465 KIR2DL3, allotypes of KIR2DL1 and of KIR2DS1 also exhibit variable binding avidities<sup>72</sup>.  
466 Whether this variation in binding avidity is due to differences in peptide-specificity or intrinsic  
467 avidity for the same peptide ligands is still unknown.

468 Inhibitory KIR, along with inhibitory receptor NKG2A, play a dominant role in education  
469 (aka licensing) of human NK cells<sup>73, 74, 75, 76</sup>. Accordingly, inhibitory receptor interaction with  
470 HLA-I maintains NK cells in a state of high responsiveness toward HLA-I-negative target  
471 cells. Conversely, interaction of activating KIR with HLA-I can reduce this NK cell  
472 responsiveness. KIR2DL1-C2 and KIR2DL3-C1 interactions confer a similar level of  
473 education to NK cells<sup>75, 76</sup>, suggesting that despite a greater peptide-specificity of KIR2DL3,  
474 the abundance of ligands presented by C1-HLA-C is sufficient to educate KIR2DL3+ NK  
475 cells.

476 KIR2DS1 binding to HLA-C does the opposite of licensing, as it disarms (i.e. reverses  
477 education, revokes the license) in C2-HLA-C+ individuals<sup>74, 75</sup>. Despite the high peptide  
478 specificity of KIR2DS1, the abundance of ligands on C2-HLA-C for disarming NK cells is

479 sufficient. In contrast, KIR2DS4+ NK cells did not seem to experience disarming<sup>74</sup>. In our  
480 experiments, KIR2DS4-SP NK cells were uneducated and hyporesponsive to HLA-I negative  
481 target cells, displaying responses similar KIR<sup>-</sup>NKG2A<sup>-</sup> cells<sup>4</sup>. Altogether, these results  
482 suggest that the abundance of specific HLA-C-peptide ligands is insufficient for KIR2DS4 to  
483 counter NK cell education. Remarkably, in both cases, 2DS4-SP NK cells<sup>4</sup> and 2DS1-SP NK  
484 cells could overcome the lack of education and trigger NK cell degranulation in response to  
485 target cells presenting a specific HLA-C-peptide ligand (Fig. 3D and 4D). In this respect,  
486 KIR2DS1 and KIR2DS4 surpass traditional NK activation receptors, which depend on NK  
487 cell education for optimal signaling.

488 Finally, our data cement the KIR in the emerging family of germline-encoded NK cell  
489 receptors with specificity for HLA-I-peptide complexes, which include CD94:NKG2C and  
490 NKp44<sup>5, 6</sup>. Specific recognition of HCMV peptide-HLA-E complexes by NKG2C+ NK cells  
491 stimulates adaptive NK cells in HCMV-infected individuals<sup>6</sup>. Such individuals often expand  
492 NK clones with restricted KIR repertoires and expression of activating KIRs<sup>77</sup>. It is possible  
493 that recognition of viral peptides by activating KIR occurs also and drives similar clonal,  
494 ‘adaptive-like’ NK cell expansions. Indeed, there is evidence that KIR2DS1+ NK cells  
495 respond to HCMV-infected fibroblasts in a virus-strain specific manner, indicative of a  
496 peptide sequence dependent response<sup>78</sup>. The task ahead is to identify specific peptide  
497 ligands for KIR in cells and tissues that may be at the core of the association of KIR-HLA  
498 combinations with disease.

| HLA-C   | Peptide   | KIR        |            | K <sub>D</sub> (μM)   | Reference                                   |
|---------|-----------|------------|------------|-----------------------|---------------------------------------------|
|         |           | Inhibitory | Activating |                       |                                             |
| C*05:01 | IIDKSGAWV | 2DL1       |            | 1.1±0.1               | This paper                                  |
|         |           |            | 2DS1       | 1.9±0.2               |                                             |
|         |           |            | 2DS4       | 2.0±0.8               |                                             |
| C*05:01 | IIDKSGAVV | 2DL1       |            | 1.00±0.1 <sup>a</sup> | This paper                                  |
|         |           |            | 2DS1       | 2.6±0.2 <sup>a</sup>  |                                             |
|         |           |            | 2DS4       | ND                    |                                             |
| C*05:01 | IIDKSGIPV | 2DL1       |            | 0.44±0.2 <sup>a</sup> | This paper                                  |
|         |           |            | 2DS1       | 2.3±0.8 <sup>a</sup>  |                                             |
|         |           |            | 2DS4       | ND                    |                                             |
| C*04:01 | QYDDAVYKL | 2DL1       |            | 7.2                   | Stewart et al., 2005<br>PNAS                |
|         |           |            | 2DS1       | 30.0                  |                                             |
| C*01:02 | LNPSVAATL |            | 2DS2       | 268.7                 | Yang et al., 2022<br>Immunology             |
| C*06:02 | YQFTGIKKY | 2DL1       |            | 8.9                   | Valez-Gomez et al.,<br>2000 Hum. Immunology |
| C*07:02 | RYRPGTVAL | 2DL3       |            | 11.0                  |                                             |
| C*03:04 | GAVDPLLAL | 2DL2       |            | 9.5                   | Boyington et al., 2000<br>Nature            |
| C*07:02 | RYRPGTVAL | 2DL3       |            | 6.9                   | Maenaka et al., 1998,<br>JBC                |
| C*07:02 | RYRPGTVAL | 2DL2       |            | 4.5                   | Moradi et al., 2021 Nat.<br>Comm.           |
| C*07:02 | RYRPGTVAL | 2DL3       |            | 4.2                   |                                             |

**Table 1. Affinities (K<sub>D</sub>) of inhibitory and activating KIR2D for peptide:HLA-C.** All affinities were determined using recombinant proteins and surface plasmon resonance, except 2DS2 with C\*01:02, which used bio-layer interferometry. <sup>a</sup>Affinity was determined by kinetic analysis of binding curves modelling association and dissociation with KIR concentrations of 2.5, 5 and 10 μM.

## Materials and Methods

### *Screening peptide libraries for KIR binding*

For peptide libraries, working dilutions of peptide (2 mM) were made in 96 well plates and frozen at -20°C. Using multi-channel pipettes,  $10^5$  cells in 190  $\mu$ l were placed in 96 well plates and incubated with 10  $\mu$ l of peptide working stock (100  $\mu$ M final concentration) overnight at 26°C. The following day, cells were stained with KIR-Fc at 4°C for 1hr or mixed with reporter cells at 37°C. For 2DL1-Fc, 2DL2-Fc, 2DL3-Fc and 2DS4-Fc binding to C\*05 and C\*08,  $5 \times 10^4$  221-C\*05-ICP47-GFP and  $5 \times 10^4$  221-C\*08-TAP-KO cells were mixed and placed in the same well prior to incubation with peptide. KIR-Fc binding to C\*05 (GFP+) and C\*08 (GFP-) was determined by KIR-Fc binding to GFP+ and GFP- cells by flow cytometry. For experiments with Jurkat-DAP12-KIR2DS4 cells,  $10^5$  TAP deficient C\*05 and C\*08 cells were incubated with peptide separately overnight at 26°C. The following day, peptide-loaded cells were mixed with  $10^5$  Jurkat-KIR2DS4 cells, centrifuged for 3 min at 300 rpm and incubated for 24 hrs at 37°C. Supernatants were collected and frozen. IL-2 concentration in thawed supernatant was measured by ELISA (Biolegend, IL-2 human). For experiments with KIR2DS1 reporter cells, TAP deficient C\*05 cells previously loaded with peptide were mixed with  $10^5$  KIR2DS1 reporter cells for 6 hrs at 37°C. Cells were washed and stained with anti-KIR2DL1/S1 mAb (EB6-APC, Beckman Coulter) for 30 mins at 4°C. Cells were then analyzed by flow cytometry.

### *Peptides*

Peptides were synthesized by Genscript (USA). The C\*05/C\*08 P2 p7p8 library (IIDKSGxxV) consisted of 361 peptides containing all amino acids at p7 and p8 except cysteine and was synthesized at crude purity. The C\*16:01/C\*16:02 P9 (SAYVKKIQF) and P18 (SATKYSRRL) p7 and p8 libraries consisted of all amino acids except Asp, Glu and Cys. All other peptides were synthesized to 90% purity by Genscript (USA)

### *Cells and culture conditions*

721.221 cells (221) cells expressing HLA-C\*05:01 and TAP inhibitor ICP47 (221-C\*05-ICP47) and TAP1 deficient 221 cells expressing HLA-C\*08:02 (221-C\*08-TAP-KO) were previously described<sup>14, 42</sup>. ICP47 was expressed with GFP via an internal ribosomal entry sequence (IRES). TAP1 deficient 221-C\*08:02 cells were generated by expression of HLA-C\*08:02 in 221-Cas9 cells followed by transduction with two gRNA targeting TAP1 (Genscript)<sup>42</sup>. BWNG KIR2DS1 reporter cells were a kind gift from Prof. Erik Dissen (University of Oslo, Norway) and have been previously described<sup>7, 79</sup>. BWNG KIR2DS1 reporter cells are derived from BW5147 mouse thymoma cells, where eGFP expression is under control of a 3× NFAT response element promoter. KIR2DS1\*001 was expressed as a chimeric fusion protein with mouse CD3ζ cytoplasmic tail, the human CD8 transmembrane region, and the extracellular domains of KIR2DS1 with an N-terminal FLAG tag. Jurkat-DAP12-KIR2DS4 cells were generated by transfection of Jurkat cells with cDNA encoding DAP12 followed by IRES-GFP via nucleofection using Amaxa® Cell Line Nucleofector® Kit V, according to the manufacturer's instructions. KIR2DS4 was expressed by lentiviral transduction with pcdh encoding KIR2DS4 cDNA. 221 cells were cultured in IMDM plus 10% fetal calf serum (FCS). Jurkat-2DS4 and BWNG-KIR2DS1 reporter cells were cultured in RPMI plus 10% FCS. Peripheral blood samples from healthy US adults were obtained from the NIH Department of Transfusion Medicine under an NIH Institutional Review Board-approved protocol (99-CC-0168) with informed consent. Primary NK cells were isolated by negative selection from peripheral blood mononuclear cells (PBMC) using the NK Cell selection kit (Stem Cell). NK cells were confirmed to be >95% CD56+ CD3- by flow cytometry. Donors for functional experiments were selected by examining KIR expression by flow cytometry. Identification of KIR2DS1 positive NK cells was determined as described using combination KIR2DL1/S1 mAb (EB6, Beckman Coulter) and KIR2DL1 mAb (#143211 R&D), as described<sup>74</sup>. All cells were cultured at 37°C and 5% CO<sub>2</sub>.

#### *Recombinant proteins*

Recombinant KIR2DL1\*003 (#1844-KR-050), KIR2DL2\*001 (#3015-KR-050), KIR2DL3\*001 (#2014-KR-050) and KIR2DS4\*001 (#1847-KR-050) KIR-Ig (KIR-Fc) fusion proteins were



purchased from R&D systems. KIR2DS1\*001-Fc was custom produced by Sino Biological. KIR-Fc were conjugated to protein-A Alexa 647 (Invitrogen, #P21462) overnight at 1:4 (molar) ratio and used at 3.6  $\mu\text{g/ml}$  unless indicated. Proteins for SPR were generated by refolding from inclusion bodies produced in BL21 (DE3) *E. coli* (Invitrogen, #EC0114). DNA encoding 2DS1 (3-200) and 2DS4 (3-200) were synthesized and cloned into pET28c by Genscript (USA). Plasmid encoding 2DL1 (1-224) in pET30a was previously described<sup>80</sup>. DNA encoding HLA-C\*05:01 (1-278) and  $\beta_2\text{M}$  (1-99) were synthesized and cloned into pET30a by Genscript and were previously described<sup>42</sup>. Protein expression was induced in bacteria carrying protein expression plasmids grown from single colonies as described<sup>81</sup>. Inclusion bodies were dissolved in 8M urea, 10 mM Tris (pH 8), 150 mM NaCl, 1 mM DTT. For KIRs, 200 mg of dissolved inclusion bodies were refolded by dilution into 1L of refolding buffer containing 400 mM L-Arginine, 100 mM Tris (pH 8), 2 mM EDTA, 0.5 mM oxidized Glutathione, 5 mM reduced Glutathione at 4°C. HLA-C\*05:01 peptide complexes were refolded by dissolving HLA-C and  $\beta_2\text{m}$  inclusion bodies separately before dropwise addition into the same refolding buffer containing 10 mg peptide. Proteins were dialyzed with 10 mM Tris (pH 8) and purified by ion exchanged chromatography with anionic resin (Q columns, Cytiva) followed by size exclusion chromatography with Superdex 200 (GE). Purified proteins were dialyzed against 10 mM Hepes (pH 7.5) 150 mM NaCl prior to SPR studies.

#### *NK cell degranulation assays*

$10^5$  TAP deficient 221-HLA-C target cells were incubated overnight with 100  $\mu\text{M}$  peptide at 26°C. The following day, target cells were washed once in RPMI media and mixed with  $10^5$  primary NK cells, centrifuged at 300 rpm for 3 mins followed by incubation at 37°C for 2hrs in the presence of BV421 conjugated anti-CD107a mAb (clone H4A3, Biolegend, #328626). Cell mixtures were then washed in PBS and stained with mAbs to CD56 (FITC or BV605, Biolegend, #318304, #318334), NKG2A (PE, clone Z199, Beckman Coulter, IM3291U), KIR2DL1/S1 (PE or APC, clone EB6, Beckman Coulter, A09778, A22332), KIR2DL2/L3/S2 (PE, clone GL183, Beckman Coulter, IM2278U), KIR2DL1 (PE or APC, clone #143211, R&D

systems, FAB1844P-100, FAB1844A-100), KIR2DS4 (PE-Cy7, clone JJC11.6, Miltenyi Biotec, 130-130-427) and KIR3DL1/S1 (PE, clone Z27, Beckman Coulter, IM3292). Gating strategies to identify Receptor negative (R-), KIR2DS4 single positive (2DS4-SP) and 2DS1-SP are shown in supplementary figures 3 and 4.

#### *Surface plasmon resonance (SPR)*

SPR experiments were conducted on a BIAcore 3000 instrument and analyzed with BIAevaluation software v4.1 (GE Healthcare). Anti-HLA-I mAb (clone W6/32, Biolegend, # 311402) was conjugated to CM5 chips (Cytvia) at 5000-7000 response units (RU) via amine coupling. HLA-C\*05:01-peptide complexes or control HLA-A\*03:01-VVVGAGGVGK were captured to 500-700 RU. HLA-C\*05:01 was captured on flow cells 2-4 with flow cell 1 left blank or captured with HLA-A\*03:01. The analytes were recombinant KIR in 10 mM HEPES (pH 7.5) 150 mM NaCl flown at 50  $\mu$ l/min. KIR were injected for 2 mins followed by a dissociation time of 5 mins. KIR binding was measured with serial two-fold dilutions of 10  $\mu$ M to 39 nM. Dissociation constants were determined by modeling steady state analysis, except for 2DL1 and 2DS1 binding to C\*05:P2-IP and C\*05:P2-AV where dissociation constants were determined by kinetic curve fitting with BIAevaluation software v4.1 using KIR concentrations of 2.5, 5 and 10  $\mu$ M.

#### *Protein database search for 2DS4 binding peptides*

The UniProt protein database was searched for potential 2DS4 binding peptides using the ScanProsite tool<sup>51</sup>. The motif [AFGHKLMNQRSTVY]-[ACGILNQSTV]-[DE]-{C}-{CW}-G-[AILMRSV]-W-[FILMV] was entered into 'Option 2: Submit MOTIFS to scan them against a PROTEIN sequence database'. This search was limited to specific taxa; homo sapiens, viruses and bacteria.

#### *Flow cytometry*

All flow cytometry experiments were carried out on BD Fortessa or Cytoflex (Beckman Coulter) and analyzed using FlowJo software.

## **Acknowledgements**

We thank Prof. Erik Dissen (University of Oslo, Norway) for kindly providing KIR2DS1 reporter cells. This work was supported by the Intramural Research Program of the NIH, National Institute of Allergy and Infectious Diseases.

## **Author contributions**

Conceptualization, M.J.W.S., E.O.L.,

Methodology, M.J.W.S., P.B, J.L.,

Investigation, M.J.W.S., P.B., K. L. W., J.L., S.R.

Writing (original draft), M.J.W.S.

Writing (review and editing), E.O.L. and M.J.W.S. with input from P.D.S., S.R.

Supervision, E.O.L., M.J.W.S, J.L., S.R., and P.D.S.

Funding acquisition, E.O.L. and P.D.S.

## References

1. Trowsdale, J. & Knight, J.C. Major histocompatibility complex genomics and human disease. *Annu Rev Genomics Hum Genet* **14**, 301-323 (2013).
2. Rossjohn, J. *et al.* T cell antigen receptor recognition of antigen-presenting molecules. *Annu Rev Immunol* **33**, 169-200 (2015).
3. Yewdell, J.W. MHC Class I Immunopeptidome: Past, Present & Future. *Mol Cell Proteomics*, 100230 (2022).
4. Sim, M.J.W. *et al.* Human NK cell receptor KIR2DS4 detects a conserved bacterial epitope presented by HLA-C. *Proc Natl Acad Sci U S A* **116**, 12964-12973 (2019).
5. Niehrs, A. *et al.* A subset of HLA-DP molecules serve as ligands for the natural cytotoxicity receptor NKp44. *Nat Immunol* **20**, 1129-1137 (2019).
6. Hammer, Q. *et al.* Peptide-specific recognition of human cytomegalovirus strains controls adaptive natural killer cells. *Nat Immunol* **19**, 453-463 (2018).
7. Thiruchelvam-Kyle, L. *et al.* The Activating Human NK Cell Receptor KIR2DS2 Recognizes a beta2-Microglobulin-Independent Ligand on Cancer Cells. *J Immunol* **198**, 2556-2567 (2017).
8. Malnati, M.S. *et al.* Peptide specificity in the recognition of MHC class I by natural killer cell clones. *Science* **267**, 1016-1018 (1995).
9. Salter, R.D. *et al.* A binding site for the T-cell co-receptor CD8 on the alpha 3 domain of HLA-A2. *Nature* **345**, 41-46 (1990).
10. Shiroishi, M. *et al.* Human inhibitory receptors Ig-like transcript 2 (ILT2) and ILT4 compete with CD8 for MHC class I binding and bind preferentially to HLA-G. *Proc Natl Acad Sci U S A* **100**, 8856-8861 (2003).
11. Matsumoto, N., Mitsuki, M., Tajima, K., Yokoyama, W.M. & Yamamoto, K. The functional binding site for the C-type lectin-like natural killer cell receptor Ly49A spans three domains of its major histocompatibility complex class I ligand. *J Exp Med* **193**, 147-158 (2001).
12. Parham, P. MHC class I molecules and KIRs in human history, health and survival. *Nat Rev Immunol* **5**, 201-214 (2005).
13. Long, E.O., Kim, H.S., Liu, D., Peterson, M.E. & Rajagopalan, S. Controlling natural killer cell responses: integration of signals for activation and inhibition. *Annu Rev Immunol* **31**, 227-258 (2013).
14. Sim, M.J. *et al.* Canonical and Cross-reactive Binding of NK Cell Inhibitory Receptors to HLA-C Allotypes Is Dictated by Peptides Bound to HLA-C. *Front Immunol* **8**, 193 (2017).
15. Rajagopalan, S. & Long, E.O. The direct binding of a p58 killer cell inhibitory receptor to human histocompatibility leukocyte antigen (HLA)-Cw4 exhibits peptide selectivity. *J Exp Med* **185**, 1523-1528 (1997).

16. Peruzzi, M., Parker, K.C., Long, E.O. & Malnati, M.S. Peptide sequence requirements for the recognition of HLA-B\*2705 by specific natural killer cells. *J Immunol* **157**, 3350-3356 (1996).
17. Kulkarni, S., Martin, M.P. & Carrington, M. The Yin and Yang of HLA and KIR in human disease. *Semin Immunol* **20**, 343-352 (2008).
18. Beziat, V., Hilton, H.G., Norman, P.J. & Traherne, J.A. Deciphering the killer-cell immunoglobulin-like receptor system at super-resolution for natural killer and T-cell biology. *Immunology* **150**, 248-264 (2017).
19. Biassoni, R. *et al.* Amino acid substitutions can influence the natural killer (NK)-mediated recognition of HLA-C molecules. Role of serine-77 and lysine-80 in the target cell protection from lysis mediated by "group 2" or "group 1" NK clones. *J Exp Med* **182**, 605-609 (1995).
20. Winter, C.C., Gumperz, J.E., Parham, P., Long, E.O. & Wagtmann, N. Direct binding and functional transfer of NK cell inhibitory receptors reveal novel patterns of HLA-C allotype recognition. *J Immunol* **161**, 571-577 (1998).
21. Stewart, C.A. *et al.* Recognition of peptide-MHC class I complexes by activating killer immunoglobulin-like receptors. *Proc Natl Acad Sci U S A* **102**, 13224-13229 (2005).
22. Biassoni, R. *et al.* Role of amino acid position 70 in the binding affinity of p50.1 and p58.1 receptors for HLA-Cw4 molecules. *Eur J Immunol* **27**, 3095-3099 (1997).
23. Naiyer, M.M. *et al.* KIR2DS2 recognizes conserved peptides derived from viral helicases in the context of HLA-C. *Sci Immunol* **2** (2017).
24. Graef, T. *et al.* KIR2DS4 is a product of gene conversion with KIR3DL2 that introduced specificity for HLA-A\*11 while diminishing avidity for HLA-C. *J Exp Med* **206**, 2557-2572 (2009).
25. Blokhuis, J.H. *et al.* KIR2DS5 allotypes that recognize the C2 epitope of HLA-C are common among Africans and absent from Europeans. *Immun Inflamm Dis* **5**, 461-468 (2017).
26. Parham, P. & Moffett, A. Variable NK cell receptors and their MHC class I ligands in immunity, reproduction and human evolution. *Nat Rev Immunol* **13**, 133-144 (2013).
27. Rajagopalan, S. & Long, E.O. Understanding how combinations of HLA and KIR genes influence disease. *J Exp Med* **201**, 1025-1029 (2005).
28. Khakoo, S.I. *et al.* HLA and NK cell inhibitory receptor genes in resolving hepatitis C virus infection. *Science* **305**, 872-874 (2004).
29. Knapp, S. *et al.* Consistent beneficial effects of killer cell immunoglobulin-like receptor 2DL3 and group 1 human leukocyte antigen-C following exposure to hepatitis C virus. *Hepatology* **51**, 1168-1175 (2010).
30. Hiby, S.E. *et al.* Combinations of maternal KIR and fetal HLA-C genes influence the risk of preeclampsia and reproductive success. *J Exp Med* **200**, 957-965 (2004).
31. Hiby, S.E. *et al.* Maternal KIR in combination with paternal HLA-C2 regulate human birth weight. *J Immunol* **192**, 5069-5073 (2014).

32. Venstrom, J.M. *et al.* HLA-C-dependent prevention of leukemia relapse by donor activating KIR2DS1. *N Engl J Med* **367**, 805-816 (2012).
33. Ruggeri, L. *et al.* Effectiveness of donor natural killer cell alloreactivity in mismatched hematopoietic transplants. *Science* **295**, 2097-2100 (2002).
34. Nelson, G.W. *et al.* Cutting edge: heterozygote advantage in autoimmune disease: hierarchy of protection/susceptibility conferred by HLA and killer Ig-like receptor combinations in psoriatic arthritis. *J Immunol* **173**, 4273-4276 (2004).
35. Moesta, A.K. *et al.* Synergistic polymorphism at two positions distal to the ligand-binding site makes KIR2DL2 a stronger receptor for HLA-C than KIR2DL3. *J Immunol* **180**, 3969-3979 (2008).
36. Vales-Gomez, M., Reyburn, H.T., Mandelboim, M. & Strominger, J.L. Kinetics of interaction of HLA-C ligands with natural killer cell inhibitory receptors. *Immunity* **9**, 337-344 (1998).
37. Boyington, J.C., Motyka, S.A., Schuck, P., Brooks, A.G. & Sun, P.D. Crystal structure of an NK cell immunoglobulin-like receptor in complex with its class I MHC ligand. *Nature* **405**, 537-543 (2000).
38. Moradi, S. *et al.* Structural plasticity of KIR2DL2 and KIR2DL3 enables altered docking geometries atop HLA-C. *Nat Commun* **12**, 2173 (2021).
39. Maenaka, K. *et al.* Killer cell immunoglobulin receptors and T cell receptors bind peptide-major histocompatibility complex class I with distinct thermodynamic and kinetic properties. *J Biol Chem* **274**, 28329-28334 (1999).
40. Sarkizova, S. *et al.* A large peptidome dataset improves HLA class I epitope prediction across most of the human population. *Nat Biotechnol* **38**, 199-209 (2020).
41. Di Marco, M. *et al.* Unveiling the Peptide Motifs of HLA-C and HLA-G from Naturally Presented Peptides and Generation of Binding Prediction Matrices. *J Immunol* **199**, 2639-2651 (2017).
42. Sim, M.J.W. *et al.* T cells discriminate between groups C1 and C2 HLA-C. *Elife* **11** (2022).
43. Fadda, L. *et al.* Peptide antagonism as a mechanism for NK cell activation. *Proc Natl Acad Sci U S A* **107**, 10160-10165 (2010).
44. Kyte, J. & Doolittle, R.F. A simple method for displaying the hydropathic character of a protein. *J Mol Biol* **157**, 105-132 (1982).
45. Liu, H.X. *et al.* Prediction of the isoelectric point of an amino acid based on GA-PLS and SVMs. *J Chem Inf Comput Sci* **44**, 161-167 (2004).
46. Schonberg, K., Sribar, M., Enczmann, J., Fischer, J.C. & Uhrberg, M. Analyses of HLA-C-specific KIR repertoires in donors with group A and B haplotypes suggest a ligand-instructed model of NK cell receptor acquisition. *Blood* **117**, 98-107 (2011).

47. Moesta, A.K. *et al.* Humans differ from other hominids in lacking an activating NK cell receptor that recognizes the C1 epitope of MHC class I. *J Immunol* **185**, 4233-4237 (2010).
48. Kennedy, P.R. *et al.* Activating KIR2DS4 Is Expressed by Uterine NK Cells and Contributes to Successful Pregnancy. *J Immunol* **197**, 4292-4300 (2016).
49. Olvera, A. *et al.* The HLA-C\*04: 01/KIR2DS4 gene combination and human leukocyte antigen alleles with high population frequency drive rate of HIV disease progression. *AIDS* **29**, 507-517 (2015).
50. Dominguez-Valentin, M. *et al.* Identification of a Natural Killer Cell Receptor Allele That Prolongs Survival of Cytomegalovirus-Positive Glioblastoma Patients. *Cancer Res* **76**, 5326-5336 (2016).
51. de Castro, E. *et al.* ScanProsite: detection of PROSITE signature matches and ProRule-associated functional and structural residues in proteins. *Nucleic Acids Res* **34**, W362-365 (2006).
52. Virolle, C., Goldlust, K., Djermoun, S., Bigot, S. & Lesterlin, C. Plasmid Transfer by Conjugation in Gram-Negative Bacteria: From the Cellular to the Community Level. *Genes (Basel)* **11** (2020).
53. Chapel, A. *et al.* Peptide-specific engagement of the activating NK cell receptor KIR2DS1. *Sci Rep* **7**, 2414 (2017).
54. Fan, Q.R., Long, E.O. & Wiley, D.C. Crystal structure of the human natural killer cell inhibitory receptor KIR2DL1-HLA-Cw4 complex. *Nat Immunol* **2**, 452-460 (2001).
55. Velikovsky, C.A. *et al.* Structure of natural killer receptor 2B4 bound to CD48 reveals basis for heterophilic recognition in signaling lymphocyte activation molecule family. *Immunity* **27**, 572-584 (2007).
56. Li, P. *et al.* Complex structure of the activating immunoreceptor NKG2D and its MHC class I-like ligand MICA. *Nat Immunol* **2**, 443-451 (2001).
57. Lunemann, S. *et al.* Sequence variations in HCV core-derived epitopes alter binding of KIR2DL3 to HLA-C \*03:04 and modulate NK cell function. *J Hepatol* **65**, 252-258 (2016).
58. Holzemer, A. *et al.* Selection of an HLA-C\*03:04-Restricted HIV-1 p24 Gag Sequence Variant Is Associated with Viral Escape from KIR2DL3+ Natural Killer Cells: Data from an Observational Cohort in South Africa. *PLoS Med* **12**, e1001900; discussion e1001900 (2015).
59. Fadda, L. *et al.* HLA-Cw\*0102-restricted HIV-1 p24 epitope variants can modulate the binding of the inhibitory KIR2DL2 receptor and primary NK cell function. *PLoS Pathog* **8**, e1002805 (2012).
60. Ziegler, M.C. *et al.* HIV-1 evades a Gag mutation that abrogates killer cell immunoglobulin-like receptor binding and disinhibits natural killer cells in infected individuals with KIR2DL2+/HLA-C\*03: 04+ genotype. *AIDS* **35**, 151-154 (2021).

61. van Teijlingen, N.H. *et al.* Sequence variations in HIV-1 p24 Gag-derived epitopes can alter binding of KIR2DL2 to HLA-C\*03:04 and modulate primary natural killer cell function. *AIDS* **28**, 1399-1408 (2014).
62. Spencer, C.T. *et al.* Viral infection causes a shift in the self peptide repertoire presented by human MHC class I molecules. *Proteomics Clin Appl* **9**, 1035-1052 (2015).
63. Reynisson, B., Alvarez, B., Paul, S., Peters, B. & Nielsen, M. NetMHCpan-4.1 and NetMHCIpan-4.0: improved predictions of MHC antigen presentation by concurrent motif deconvolution and integration of MS MHC eluted ligand data. *Nucleic Acids Res* **48**, W449-W454 (2020).
64. Burton, J. *et al.* Inefficient exploitation of accessory receptors reduces the sensitivity of chimeric antigen receptors. *Proc Natl Acad Sci U S A* **120**, e2216352120 (2023).
65. Xiong, S. *et al.* Maternal uterine NK cell-activating receptor KIR2DS1 enhances placentation. *J Clin Invest* **123**, 4264-4272 (2013).
66. Archbold, J.K. *et al.* Natural micropolymorphism in human leukocyte antigens provides a basis for genetic control of antigen recognition. *J Exp Med* **206**, 209-219 (2009).
67. Merino, A.M. *et al.* KIR2DS4 promotes HIV-1 pathogenesis: new evidence from analyses of immunogenetic data and natural killer cell function. *PLoS One* **9**, e99353 (2014).
68. Parham, P., Norman, P.J., Abi-Rached, L. & Guethlein, L.A. Human-specific evolution of killer cell immunoglobulin-like receptor recognition of major histocompatibility complex class I molecules. *Philos Trans R Soc Lond B Biol Sci* **367**, 800-811 (2012).
69. Correa, I. & Raulet, D.H. Binding of diverse peptides to MHC class I molecules inhibits target cell lysis by activated natural killer cells. *Immunity* **2**, 61-71 (1995).
70. Orihuela, M., Margulies, D.H. & Yokoyama, W.M. The natural killer cell receptor Ly-49A recognizes a peptide-induced conformational determinant on its major histocompatibility complex class I ligand. *Proc Natl Acad Sci U S A* **93**, 11792-11797 (1996).
71. Abi-Rached, L. & Parham, P. Natural selection drives recurrent formation of activating killer cell immunoglobulin-like receptor and Ly49 from inhibitory homologues. *J Exp Med* **201**, 1319-1332 (2005).
72. Hilton, H.G. *et al.* Polymorphic HLA-C Receptors Balance the Functional Characteristics of KIR Haplotypes. *J Immunol* **195**, 3160-3170 (2015).
73. Anfossi, N. *et al.* Human NK cell education by inhibitory receptors for MHC class I. *Immunity* **25**, 331-342 (2006).
74. Fauriat, C., Ivarsson, M.A., Ljunggren, H.G., Malmberg, K.J. & Michaelsson, J. Education of human natural killer cells by activating killer cell immunoglobulin-like receptors. *Blood* **115**, 1166-1174 (2010).



75. Sim, M.J. *et al.* KIR2DL3 and KIR2DL1 show similar impact on licensing of human NK cells. *Eur J Immunol* **46**, 185-191 (2016).
76. Goodridge, J.P. *et al.* Remodeling of secretory lysosomes during education tunes functional potential in NK cells. *Nat Commun* **10**, 514 (2019).
77. Beziat, V. *et al.* NK cell responses to cytomegalovirus infection lead to stable imprints in the human KIR repertoire and involve activating KIRs. *Blood* **121**, 2678-2688 (2013).
78. van der Ploeg, K. *et al.* Modulation of Human Leukocyte Antigen-C by Human Cytomegalovirus Stimulates KIR2DS1 Recognition by Natural Killer Cells. *Front Immunol* **8**, 298 (2017).
79. Daws, M.R. *et al.* Identification of an MHC class I ligand for the single member of a killer cell lectin-like receptor family, KLRH1. *J Immunol* **189**, 5178-5184 (2012).
80. Kumar, S. *et al.* A single amino acid change in inhibitory killer cell Ig-like receptor results in constitutive receptor self-association and phosphorylation. *J Immunol* **194**, 817-826 (2015).
81. Garboczi, D.N., Hung, D.T. & Wiley, D.C. HLA-A2-peptide complexes: refolding and crystallization of molecules expressed in *Escherichia coli* and complexed with single antigenic peptides. *Proc Natl Acad Sci U S A* **89**, 3429-3433 (1992).

## Figure Legends

### Figure 1. Peptide specificity of KIR2DL1, KIR2DL2, and KIR2DL3 binding to HLA-C

- (A) Heatmaps displaying soluble KIR-Fc binding to TAP-deficient cells expressing HLA-C\*05:01 or HLA-C\*08:02 pre-loaded with a library of peptide P2 (IIDKSGxxV) modified at p7 and p8. For 2DL1-C\*05, data are relative to maximum binding with p7p8 ST. For 2DL2-C\*08 and 2DL3-C\*08 data are relative to maximum 2DL2 binding with p7p8 LP. Mean MdFI (Median fluorescence intensity) of two independent experiments relative to maximum binding as measured by flow cytometry is shown.
- (B) Correlation of 2DL1-Fc binding to C\*05 and 2DL2-Fc binding to C\*08, determined from data in (A).
- (C) Correlation of 2DL2-Fc and 2DL3-Fc binding to C\*08 determined from data in (A).
- (D) R-squared ( $R^2$ ) values derived from regression analysis correlating inhibitory KIR-Fc binding with biochemical characteristics at peptide p7, p8 and p7p8 combined. Correlations with mass and hydrophathy index (Hydro) were analyzed by linear regression and pI (isoelectric point) with non-linear regression. Mass = amino acid mass (Da), Hydro = hydrophathy index, pI = isoelectric point. For mass and hydrophathy  $p7p8 = p7 + p8$ , for pI  $p7p8 = (p7+p8)/2$ .
- (E) Pearson (r) values from correlations of inhibitory KIR-Fc binding with p7, p8, p7+p8 mass and hydrophathy index.
- (F) Correlation of 2DL1-C\*05 and 2DL2-C\*08 with p7p8 Mass, hydrophathy index and pI. Regression lines and  $R^2$  values are displayed.
- (G) 2DL1-Fc binding to C\*16:02 (C2), and 2DL2-Fc and 2DL3-Fc binding to C\*16:01 (C1) on TAP-deficient cells loaded with 19 C\*16:01 self peptides or no peptide was determined by flow cytometry. MdFI from three independent experiments are shown.
- (H) Proportion of peptides that provide at least half-maximal KIR binding is shown for each of the indicated KIR-HLA-C pairs.

### Figure 2. Different peptide sequences dictate KIR2DL2/3 binding to C1 and crossreactive binding to C2 HLA-C

- (A) Heatmaps displaying binding of soluble KIR-Fc to TAP-deficient cells expressing HLA-C\*05:01 (C2) or HLA-C\*08:02 (C1) pre-loaded with a library of peptide P2 (IIDKSGxxV) modified at p7 and p8. Data show 2DL1-Fc binding to C\*08:02 relative to maximum binding to C\*05:01 with ST, and 2DL2-Fc and 2DL3-Fc binding to C\*05:01, relative to maximum 2DL2-Fc binding with IT. KIR-Fc binding was measured by flow cytometry, mean MdFI of two independent experiments are shown.
- (B) Correlation of 2DL2-Fc and 2DL3-Fc binding to C\*05:01, determined from data in (A).

- (C) Correlation of 2DL2-Fc binding to C\*08 and C\*05, determined from data in Fig. 1A and 2A.
- (D) Flow cytometry histograms displaying 2DL2-Fc binding to TAP-deficient C\*08 (C1) and C\*05 (C2) with indicated peptides.
- (E) Flow cytometry histograms displaying 2DL2-Fc binding to TAP-deficient C\*16:01 (C1) and C\*16:02 (C2) pre-loaded with indicated peptides.
- (F) 2DL2-Fc binding to C\*16:01 (C1) and C\*16:02 (C2) on TAP-deficient cells loaded with 19 C\*16:01 self peptides or no peptide. Data for 2DL2-C\*16:01 is the same as in Fig. 1G. Data from three independent experiments are shown.

### **Figure 3. High peptide specificity of KIR2DS4 binding to C1 and C2-HLA-C**

- (A) Heatmaps displaying IL-2 secretion by 2DS4+ Jurkat T cells in response to C\*08 (left) and C\*05 (right) pre-loaded with the P2-p7p8 peptide library on TAP-deficient cells. IL-2 secretion was measured by ELISA. Mean of two experiments are shown, normalized to maximal responses with MW for C\*08 and IW for C\*05.
- (B) Correlation of Jurkat-2DS4 responses to C\*05 and C\*08, determined from data in (A).
- (C) 2DS4-Fc binding to C\*05 and C\*08 with p8W peptides containing substitutions at p7 of peptide IIDKSGxWV pre-loaded on TAP-deficient cells, as measured by flow cytometry. Mean of three independent experiments is shown.
- (D) Degranulation of primary resting 2DS4 single positive (2DS4-SP) NK cells in response to C\*05 and C\*08 cells treated as in (C). Gating for 2DS4-SP NK cells is shown in SFig. 4B. Mean responses of three donors are shown.
- (E) Correlation of 2DS4-Fc binding shown in (C) and CD107a responses of 2DS4-SP NK cells shown in (D) to C\*08 (top) and C\*05 (bottom).
- (F) Correlation of inhibitory and activating KIR recognition of P2 p7p8 library. 2DL2-Fc binding and Jurkat-2DS4 responses to C\*08, and 2DL1-Fc and Jurkat-2DS4 responses to C\*05.
- (G) 2DS4-Fc binding to C\*16:01 (C1) and C\*16:02 (C2) TAP-deficient cells pre-loaded with 19 self peptides (peptide sequences as in 1G).
- (H) 2DS4-Fc binding to C\*08 or C\*05 on cells pre-loaded with P2-MW (IIDKSxMWV) and p6 substitutions. Data are mean MdFI from three independent experiments relative to P2-MW with p6 Gly.
- (I) Representative SPR sensorgrams displaying 2DS4 binding at 2.5  $\mu$ M to captured C\*05 refolded with  $\beta$ 2-microglobulin and the peptides P2-AW (IIDKSGAWV), P2-IP (IIDKSGIPV) and P2-AV (IIDKSGAVV). Binding to reference flow cell is subtracted.

- (J) Equilibrium analysis of surface plasmon resonance (SPR) measurements of 2DS4 binding to captured C\*05 refolded with  $\beta$ 2-microglobulin and the peptides P2-AW (IIDKSGAWV), P2-IP (IIDKSGIPV) and P2-AV (IIDKSGAVV). Mean responses at each analyte concentration (circles) and standard error between n=5 injections (error bars) are shown. Non-linear regression curve fit of the one-to-one specific binding model (line) are shown.  $K_D$  value  $\pm$  standard deviation is shown calculated by modelling steady state kinetics for P2-AW. No  $K_D$  was determined for 2DS4 binding to P2-IP and P2-AV (ND).

#### Figure 4. Prediction of KIR2DS4 ligands by sequence homology

- (A) Peptide motif used to search UNIPROT database, including amino acids at >1% frequency based on C\*05 immunopeptidome. Position 6, p7 and p8 of motif is based on 2DS4 ligands identified in Fig. 4A and 5A. C\*05 anchor positions are underlined. 2DS4 binding motif is in bold. C\*05 immunopeptidome from Sarkizova et al 2020.
- (B) Number of potential 2DS4 binding epitopes predicted using motif in (A) and ScanProsite tool (De Castro E et al 2006).
- (C) Binding of 2DS4-Fc to TAP-deficient C\*08 and C\*05 cells pre-loaded with indicated bacterial peptides.
- (D) Degranulation of primary resting 2DS4-SP and Receptor negative (R-) NK cells in response to predicted bacterial 2DS4 ligands pre-loaded on TAP-deficient C\*08 or C\*05 cells. Gating for R- (2DL1/2/3/S1/S2/S4-, NKG2A-, KIR3DL1-) and 2DS4-SP NK cell populations is shown in SFig. 4B. Data from two NK cell donors are shown.
- (E) Sequence of TraQ peptide in 5 pathogenic bacterial species.

#### Figure 5. Strong binding and high peptide specificity of KIR2DS1 for C2 HLA-C

- (A) Heatmap displaying activation of BWNG-2DS1 reporter cells to TAP-deficient C\*05 cells pre-loaded with P2-p7p8 peptide library. Mean responses, relative to maximum response with P2-IS (IIDKSGISV) from two independent experiments are shown.
- (B) Correlation of 2DS1 response to C\*05 loaded with P2-p7p8 peptide library, as shown in (A), with binding of 2DL1-Fc (data from Fig. 1A) and 2DL2-Fc (data from Fig. 2A).
- (C) Flow cytometry histograms displaying 2DS1-Fc binding to TAP-deficient C\*05 cells pre-loaded with peptides identified in (A) conferring strong (P2-IA; IIDKSGIAV), weak (P2-KS; IIDKSGKSV), and no responses (P2-SE; IIDKSGSEV) to BWNG-2DS1 reporter cells. NP = no peptide.
- (D) 2DS1-Fc and 2DL1-Fc binding to TAP-deficient C\*05 cells pre-loaded with peptides P2-IA, P2-IS and P2-IP, P2-KS and P2-SE. MdfI from three independent experiments are shown.

- (E) Degranulation of primary resting NK cell subsets in response to C\*05 cells pre-loaded with peptides shown in (D). Gating for 2DS1 single positive (2DS1-SP), NKG2A-SP and R- NK cell subsets is shown in SFig. 6B. Data from three NK cell donors are shown
- (F) 2DL1-Fc and 2DS1-Fc binding to 221-C\*05:01 (N77, K80), 221-C\*08:02 (S77, N80), 221-C\*05:01-K80N (N77, N80) and 221-C\*05:01-N77S (S77, K80). KIR-Fc binding is relative to HLA-I expression measured by W6/32. Data shown are mean and standard error from three independent experiments.
- (G) Representative biacore sensorgrams displaying 2DS1 (*left*) and 2DL1 (*right*) binding with 2.5  $\mu$ M KIR to captured C\*05 refolded with peptides P2-IP (IIDKSGIPV), P2-AV, and P2-AW by SPR. Binding to reference flow cell was subtracted.
- (H) Representative biacore sensorgrams displaying 2DS1 (*left*) and 2DL1 (*right*) binding to captured C\*05 refolded with peptides P2-AW by SPR. Binding was measured with two-fold dilutions of KIR from 10  $\mu$ M to 313 nM. Binding to reference flow cell was subtracted.
- (I) Equilibrium analysis of SPR measurements of 2DL1 and 2DS1 binding to captured C\*05 refolded with P2-AW. Mean responses at each analyte concentration and standard error between n=5 injections are shown. Non-linear regression curve fit of the one-to-one specific binding model are shown. Calculated  $K_D$  value  $\pm$  standard deviation is shown by modelling steady state kinetics.

**Figure 6. Amino acid substitutions optimize peptide-specific KIR binding to HLA-C\*16:02**

- (A) KIR-Fc (2DL1, 2DL2, 2DL3, 2DS1 and 2DS4) binding to TAP-deficient C\*16:02 (C2) cells pre-loaded with P9 (SAYVKKIQF), P18 (SATKYSRRL) and p7p8 substitutions. NP = no peptide, P9-IN = SAYVKKINF, P9-IW = SAYVKKIWF, P18-RA = SATKYSRAL.
- (B) Relative KIR binding to C\*16:02 loaded with peptides P9 and P18 with substitutions at p7 and p8.
- (C) Proportion of peptide substitutions at p7 and p8 in P9 and P18 that increase or decrease KIR binding, relative to unmodified peptides.
- (D) Impact of p7 and p8 substitutions in P9 and P18 on KIR-Fc binding to C\*16:02 (C2). Data are mean MdFI from two independent experiments.

**Figure 7. KIR (2DL1, 2DL2, 2DL3, 2DS1, 2DS4) binding to different HLA-C allotypes is dependent on peptide backbone.**

Correlations of KIR binding to the same p7p8 sequences in the context of peptide P2 (IIDKSGxxV) presented by C\*05:01 and peptide P9 (SAYVKKxxF) (**A**) or P18 (SATKYSxxL) (**B**), presented by C\*16:02. Data are normalized to the maximum value for each peptide backbone.

**Supplementary Figure 1. Peptide specificity of KIR2DL1, KIR2DL2 and KIR2DL3 binding to HLA-C**

- (A) Correlation between repeats of 2DL1-Fc, 2DL2-Fc and 2DL3-Fc binding to C\*05 and C\*08 in the presence of a 361 peptide library based on p7p8 substitutions in P2 (IIDKSGxxV). As shown in Fig. 1A.
- (B) Flow cytometry histograms displaying 2DL1-Fc binding to C\*05 (C2) and 2DL2-Fc binding to C\*08 (C1) loaded with indicated peptides.
- (C) Correlation and regression analysis of peptide p7 and p8 biochemical properties and KIR2DL1 and KIR2DL2 binding to HLA-C. Linear regression was used for peptide mass and hydrophathy index while non-linear regression was used for analysis of pI (isoelectric point).
- (D) Flow cytometry histograms displaying HLA-I expression on 221, 221-C\*16:01, 221-C\*16:02, 221-C\*16:01-ICP47 and 221-C\*16:02-ICP47.
- (E) Stabilization of HLA-C by indicated peptides loaded on 221-C\*16:01-ICP47 (*left*) and 221-C\*16:02-ICP47 (*right*).
- (F) Flow cytometry histograms displaying 2DL1-Fc binding to C\*16:02 (C2) and 2DL2-Fc binding to C\*16:01 (C1) loaded with indicated peptides.

**Supplementary Figure 2. Peptide specificity of crossreactive KIR2DL1, KIR2DL2 and KIR2DL3 binding to HLA-C.**

- (A) Correlation between repeats of 2DL1-Fc, 2DL2-Fc and 2DL3-fc binding to C\*08 and C\*05 in the presence of a 361 peptide library based on p7p8 substitutions in P2 (IIDKSGxxV). As shown in Fig. 2A.
- (B) Flow cytometry histograms displaying 2DL1-Fc binding to C\*08 (C1) and C\*05 (C2) loaded with indicated peptides.
- (C) 2DL1-Fc binding to C\*16:01 pre-loaded with 19 self peptides or no peptide on TAP-deficient cells.

**Supplementary Figure 3. KIR2DS4 is a peptide specific receptor for C1 and C2 HLA-C.**

- (A) Correlation between repeats Jurkat-2DS4 responses to C\*08 and C\*05 pre-loaded with 361 peptide library based on p7p8 substitutions in P2 (IIDKSGxxV). As shown in Fig. 3A.

- (B) 2DS4-Fc binding to C\*08 (C1, *left*) and C\*05 (C2, *right*) loaded with p7 variants of IIDKSGxWV.
- (C) Flow cytometry gating strategy to identify R-S4- (Receptor negative, 2DS4 negative) and 2DS4 single positive (2DS4-SP) subsets. Receptor refers to 2DL2/L3/S2 (mAb GL183), KIR3DL1 (mAb Z70) and NKG2A (mAb Z199). NK cells are identified as CD56+ lymphocytes, GFP- (target cells). NK cells are first gated as 2DL1/S1- (mAb EB6) prior to gating on R and S4.
- (D) Degranulation of 2DS4-SP NK cells upon mixing with C\*08 (*left*) and C\*05 (*right*) cells loaded with p7 variants of IIDKSGxWV as measured by flow cytometry.
- (E) 2DS4-Fc binding to C\*16:01 (C1, *left*) and C\*16:02 (C2, *right*) loaded with no peptide (NP), P1 (AAADLERFF), P9 (SAYVKKIQF) and P18 (SATKYSRRL).
- (F) Correlation of 2DS4-Fc with 2DL1-Fc binding to C\*16:02 (*top*) and of 2DS4-Fc with 2DL2-Fc binding to C\*16:01 (*bottom*). KIR-Fc binding was measured by flow cytometry with peptides pre-loaded on TAP-deficient cells.
- (G) 2DS4-Fc binding to C\*08 (C1, *left*) and C\*05 (C2, *right*) cells loaded with p6 variants of IIDKSxMWV.

**Supplementary Figure 4. KIR2DS1 is a peptide specific receptor for C2 HLA-C.**

- (A) Correlation between repeat experiments of BWN3G-KIR2DS1-NFAT-GFP responses to C\*05 pre-loaded with 361 peptide library based on p7p8 substitutions in P2 (IIDKSGxxV). As shown in Fig. 4A. Data are normalized to maximum GFP+ve cells obtained with p7p8 IS as shown in (B)
- (B) GFP expression in BWNG-KIR2DS1-NFAT-GFP reporter cells after mixing with peptide loaded C\*05 positive cells. NP (no peptide), P2-IS (IIDKSGISV), P2-LA (IIDKSGGLAV) and P2-ID (IIDKSGIDV).
- (C) Flow cytometry gating strategy to identify R- (Receptor negative), KIR2DS1 single positive (2DS1-SP), KIR2DS1 negative (2DS1-) and NKG2A single positive cells (NKG2A-SP). Receptor refers to 2DL2/L3/S2 (GL183), KIR3DL1 (Z70) and NKG2A (Z199). NK cells are identified as CD56+ lymphocytes, GFP- (target cells).
- (D) Degranulation of NK cell subsets upon mixing with C\*05 cells pre-loaded with indicated peptides or no-peptide as measured by flow cytometry. Gating strategy is shown in (C).
- (E) Flow cytometry histograms displaying 2DS1-Fc binding to C\*16:02 (C2) pre-loaded with 19 self peptides on TAP deficient cells.
- (F) 2DS1-Fc binding to C\*16:02 as in (E). Mean MFI normalized to maximum binding observed with peptide P13 from two independent experiments.

- (G) Correlation of 2DS1-Fc with 2DL1-Fc, and of 2DS1-Fc with 2DL2-Fc binding to C\*16:02 cells. KIR-Fc binding was measured by flow cytometry with peptides pre-loaded on TAP-deficient cells.

**Supplementary Figure 5. Position 7 and p8 peptide substitutions presented by C\*16:02 generate potent KIR2S4 ligands.**

- (A) Flow cytometry histograms displaying expression of CD107a on Receptor negative 2DS4+ (R-S4+) NK cells in response to C\*16:01 or C\*16:02 cells loaded with indicated p8 variants of P9 (SAYVKKIQF) and P18 (SATKYSRRL).
- (B) Degranulation of NK cell subsets in response to C\*16:01 and C\*16:02 cells loaded with peptides shown in (A). R- 2DS4- and 2DS4-SP NK subsets were gated as shown in SFig. 3C. Data from two NK cell donors are shown.

**Supplementary Figure 6. Impact of p7 and p8 substitutions in P9 and P18 on KIR2DL2 and KIR2DL3 binding to C\*16:01 (C1).**

- (A) Flow cytometry histograms displaying 2DL2-Fc binding to C\*16:01 cells loaded with indicated peptides. NP = no peptide.
- (B) Relative KIR binding to C\*16:01 cells loaded with P9 and P18 with substitutions at p7 and p8. Data are relative to the strong 2DL2-Fc binding to P5, shown in Fig. 1G.
- (C) Correlation of 2DL2-Fc and 2DL3-Fc binding to P9 and P18 with p7p8 substitutions when preloaded on C\*16:01 (C1) and C\*16:01 (C2). Data are normalized to binding with P18.
- (D) Flow cytometry histograms displaying 2DL2-Fc binding to C\*16:01 and C\*16:02 pre-loaded with indicated peptides on TAP-deficient cells.

**Supplementary Figure 7. Impact of peptide backbone on 2DL2 binding to C1-HLA-C.**

Correlation of 2DL2 binding to the same p7p8 sequences in the context of peptide P2 (IIDKSGxxV) presented by C\*08:02 and peptide P9 (SAYVKKxxF) (*left*) or P18 (SATKYSxxL) (*right*), presented by C\*16:01. Data are normalized to the maximum value.



# Figure 1 Peptide specificity of KIR2DL1, KIR2DL2, and KIR2DL3 binding to HLA-C

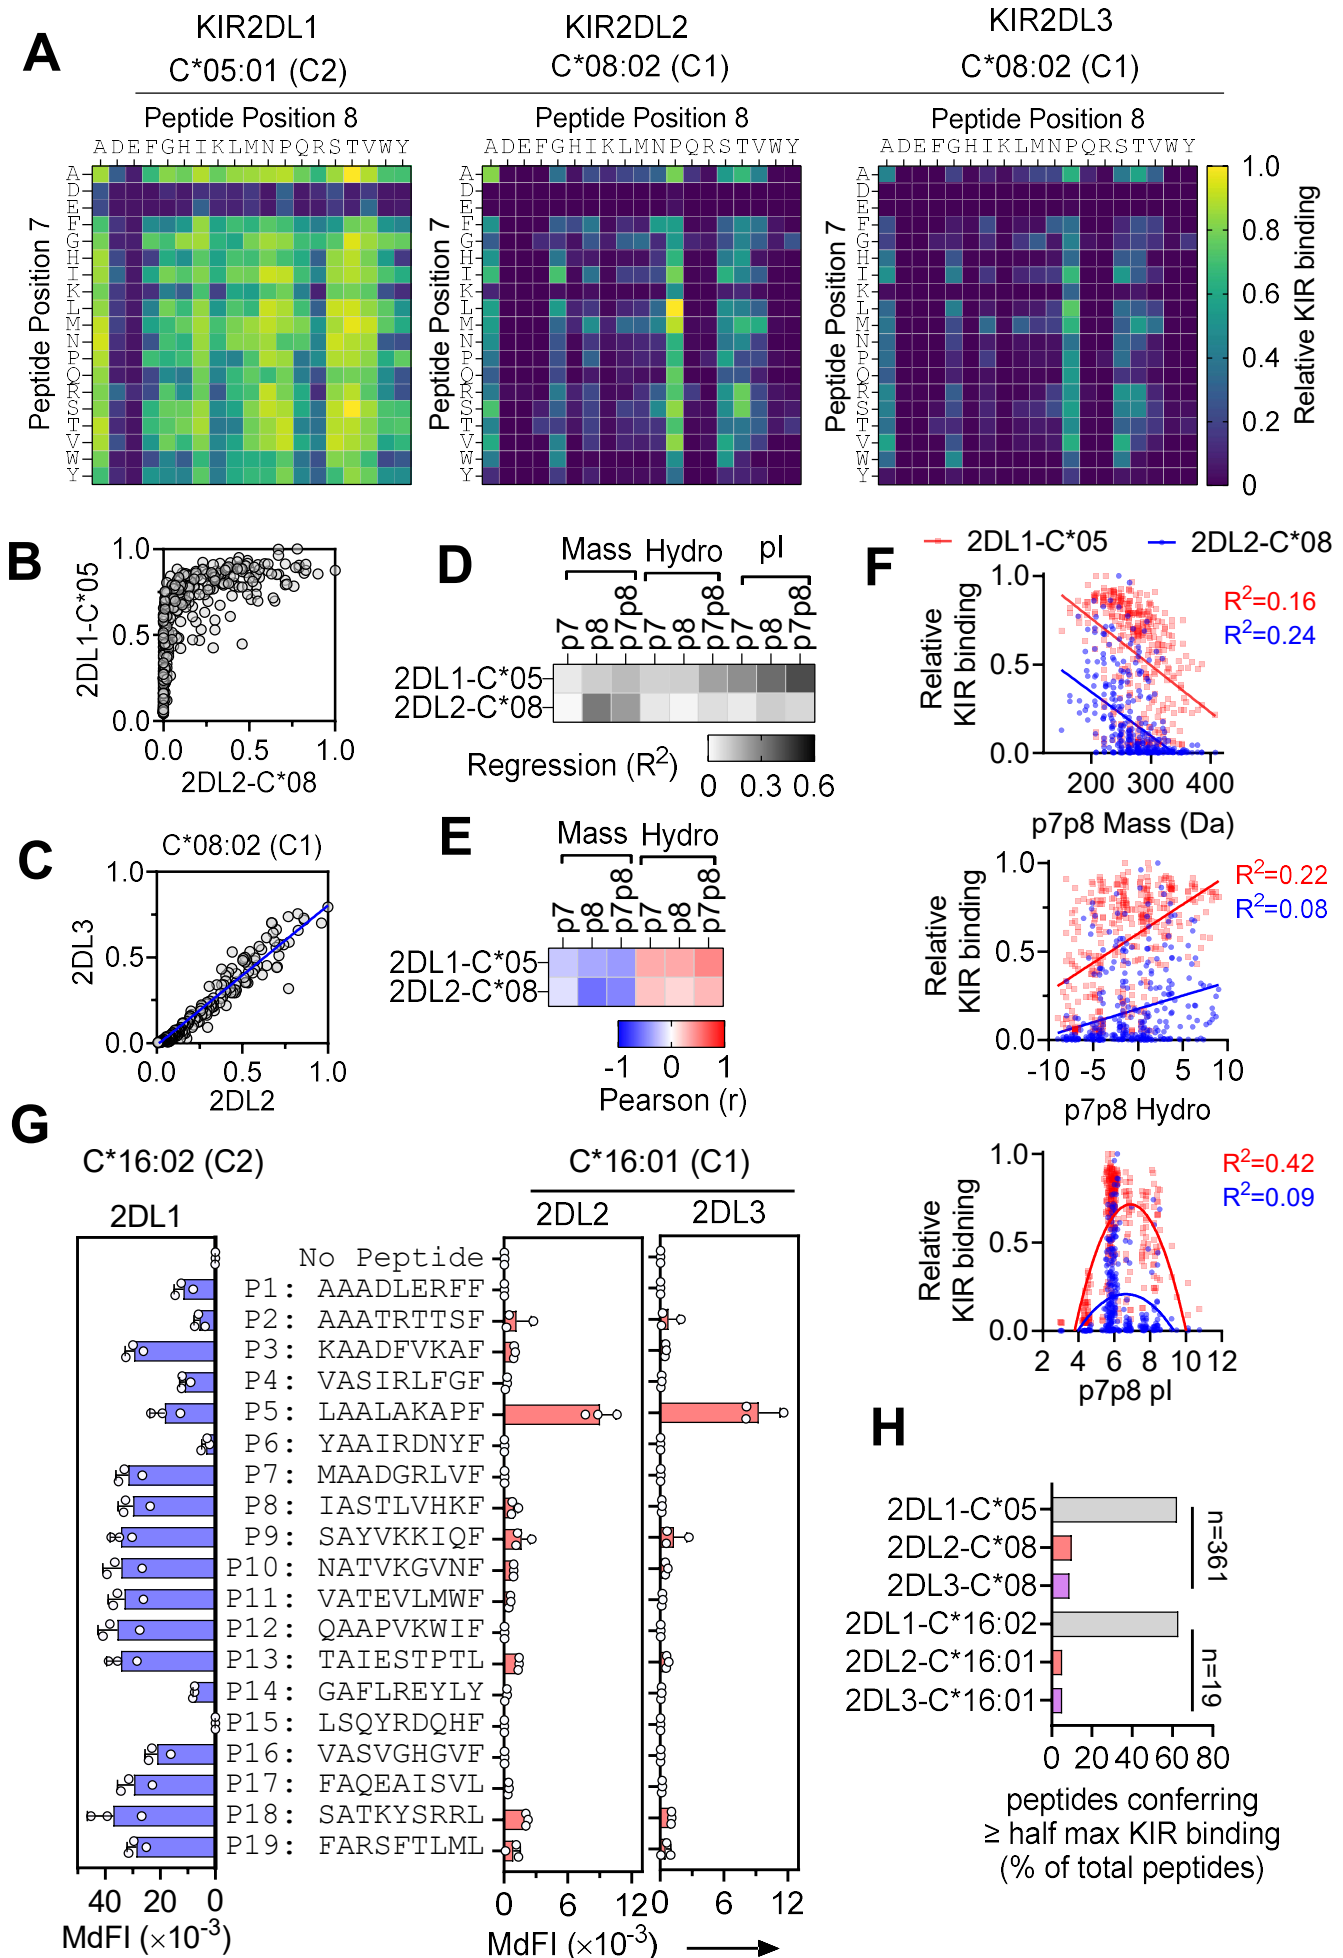

## Figure 2. Different peptide sequences dictate KIR2DL2/3 binding to C1 and crossreactive binding to C2 HLA-C

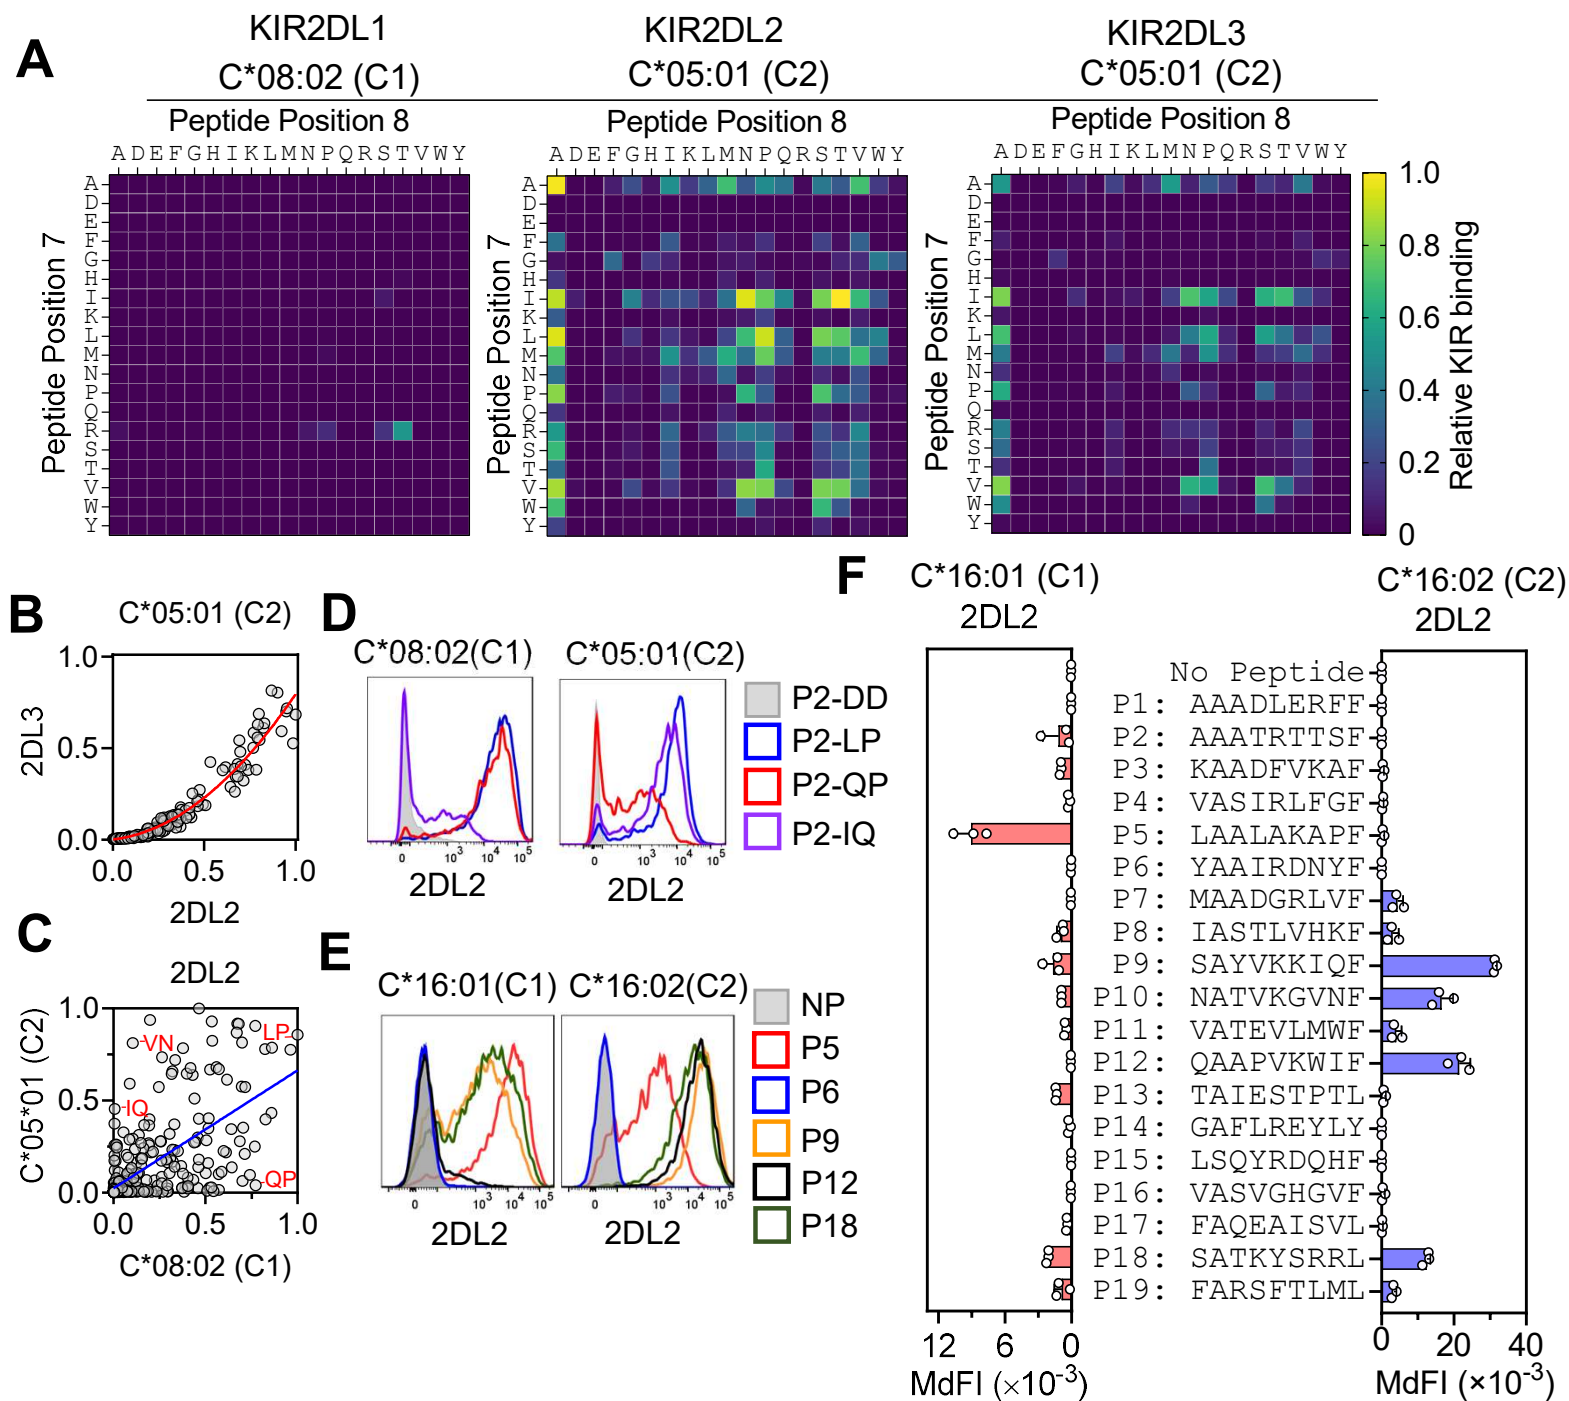

# Figure 3. KIR2DS4 is a peptide-specific receptor for both C1 and C2 HLA-C

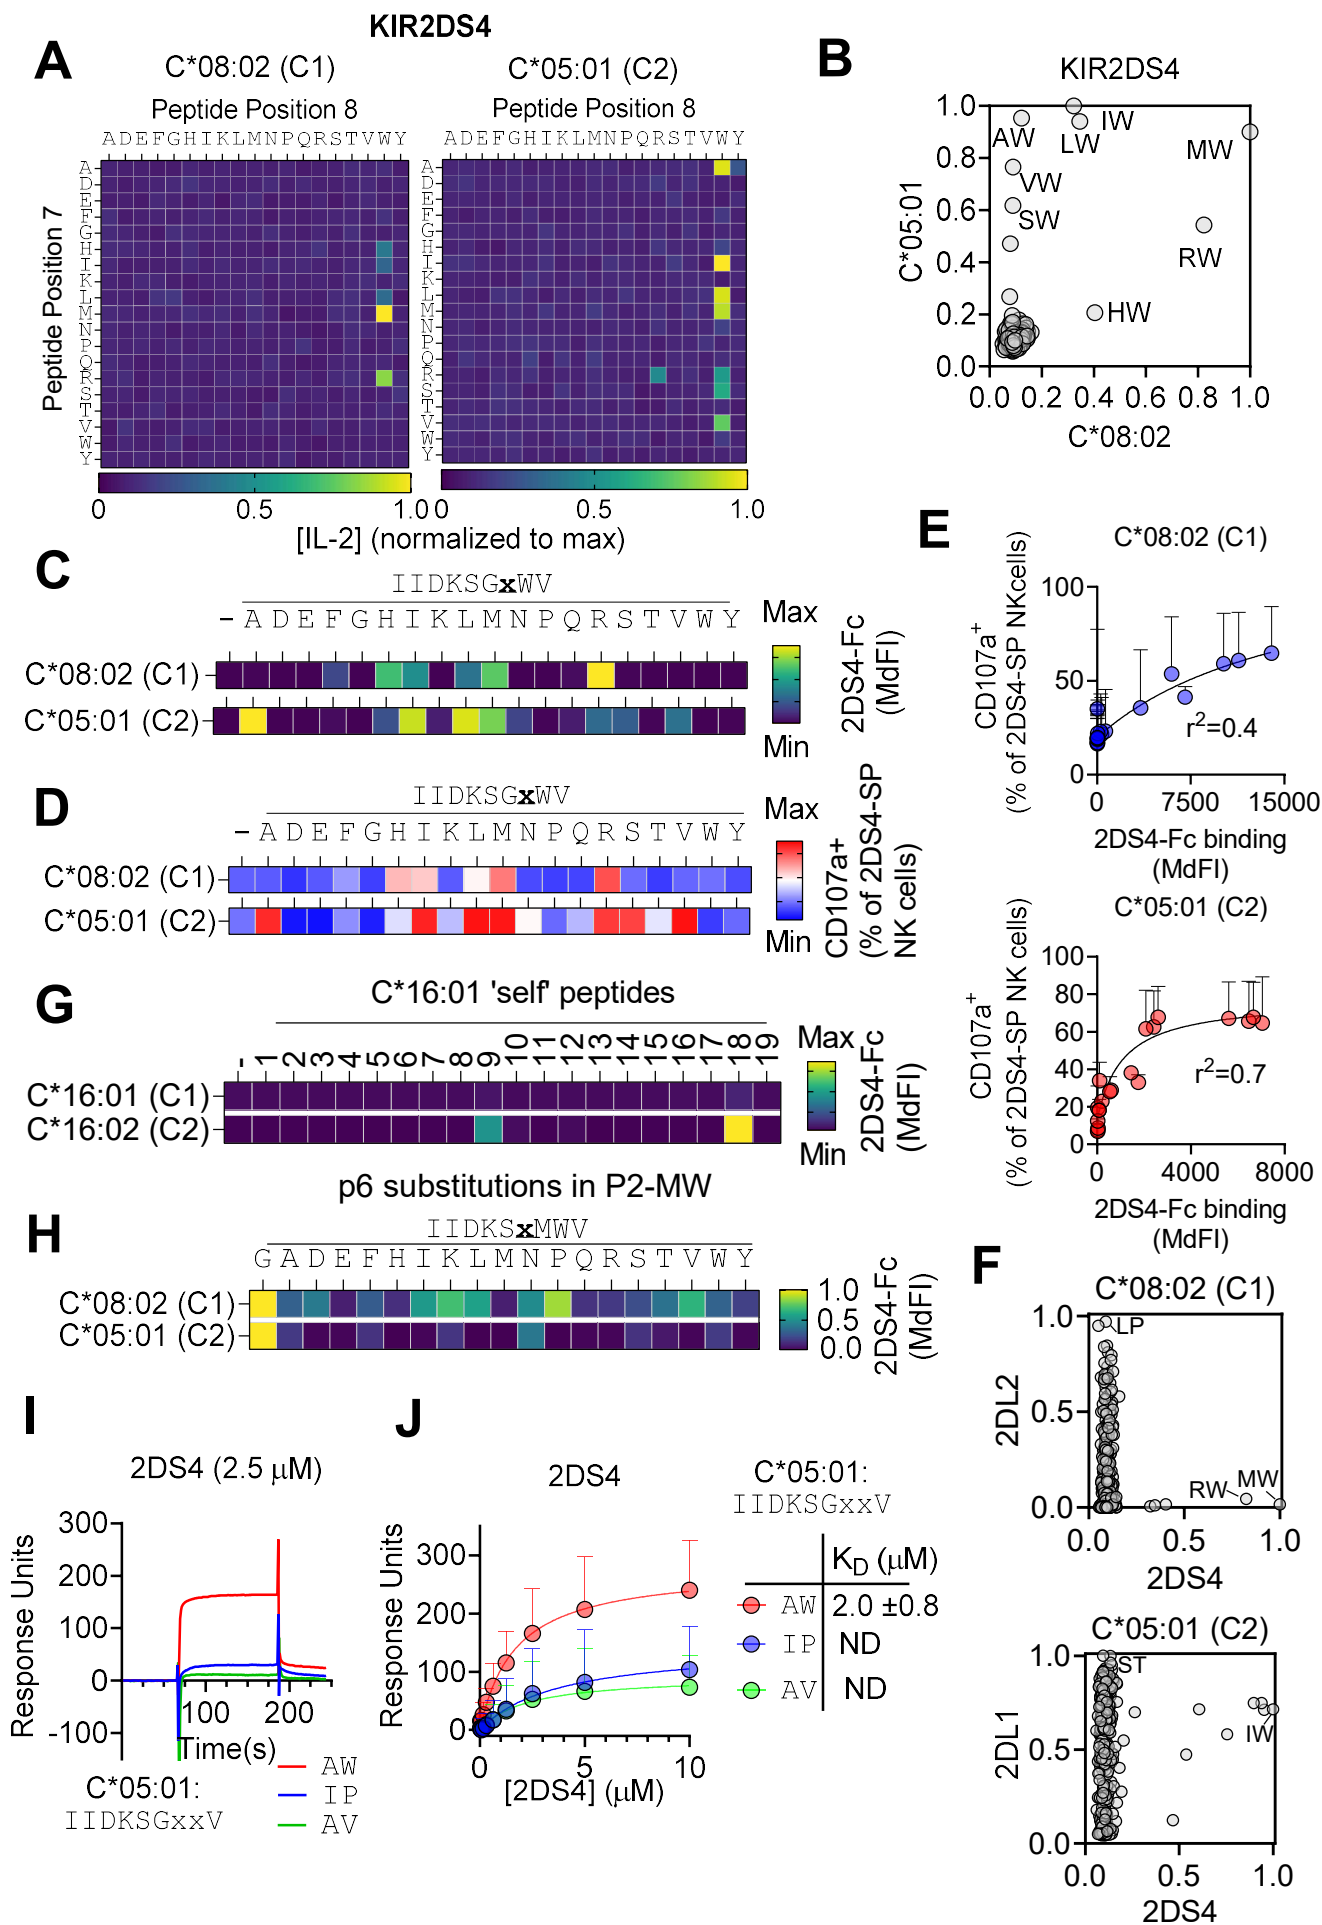

## Figure 4. Prediction of KIR2DS4 ligands by sequence homology

### A Motif for 9mer peptide binding to C\*05:01 and 2DS4

| 1   | 2   | 3  | 4   | 5   | 6 | 7   | 8 | 9   |
|-----|-----|----|-----|-----|---|-----|---|-----|
| AFG | ACG | DE | ADE | ADE | G | AIL | W | FIL |
| HIK | ILN |    | FGH | FGH |   | MRS |   | MV  |
| LMN | QST |    | IKL | IKL |   | V   |   |     |
| QRS | V   |    | MNP | MNP |   |     |   |     |
| TVY |     |    | QRS | QRS |   |     |   |     |
|     |     |    | TVW | TVY |   |     |   |     |
|     |     |    | Y   |     |   |     |   |     |

Search UniProt database using ScanProsite

### B ProScan predicted 2DS4 binding peptides

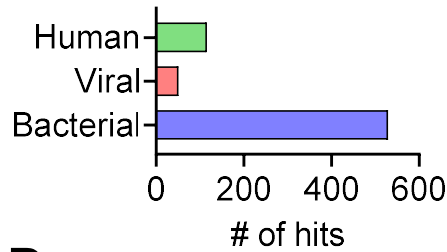

### C C\*08:02 (C1)

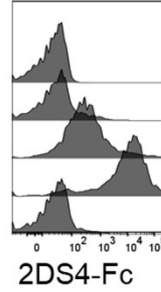

### C\*05:01 (C2)

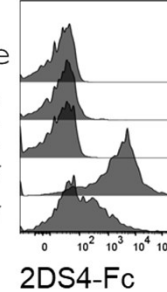

### D C\*08:02 (C1) C\*05:01 (C2)

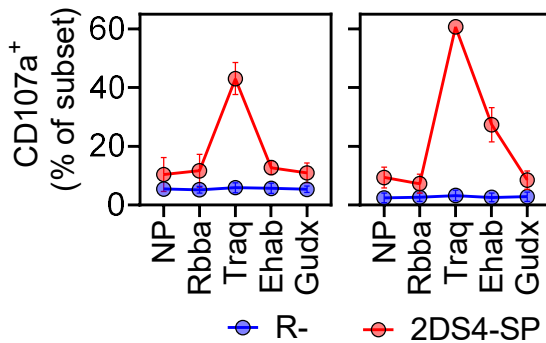

### E Type-F conjugative transfer system pilin chaperone, TraQ

| Species             | Sequence                              |
|---------------------|---------------------------------------|
| <i>E. coli</i>      | <sup>10</sup> RLDITGMWV <sub>18</sub> |
| <i>K. pneumonia</i> | <sup>10</sup> RLDITGMWV <sub>18</sub> |
| <i>S. enterica</i>  | <sup>11</sup> RLDITGMWV <sub>19</sub> |
| <i>S. sonnei</i>    | <sup>11</sup> RLDITGMWV <sub>19</sub> |
| <i>A. baumannii</i> | <sup>10</sup> RLDITGMWV <sub>18</sub> |

# Figure 5. High peptide specificity and strong binding of KIR2DS1 to C2-HLA-C

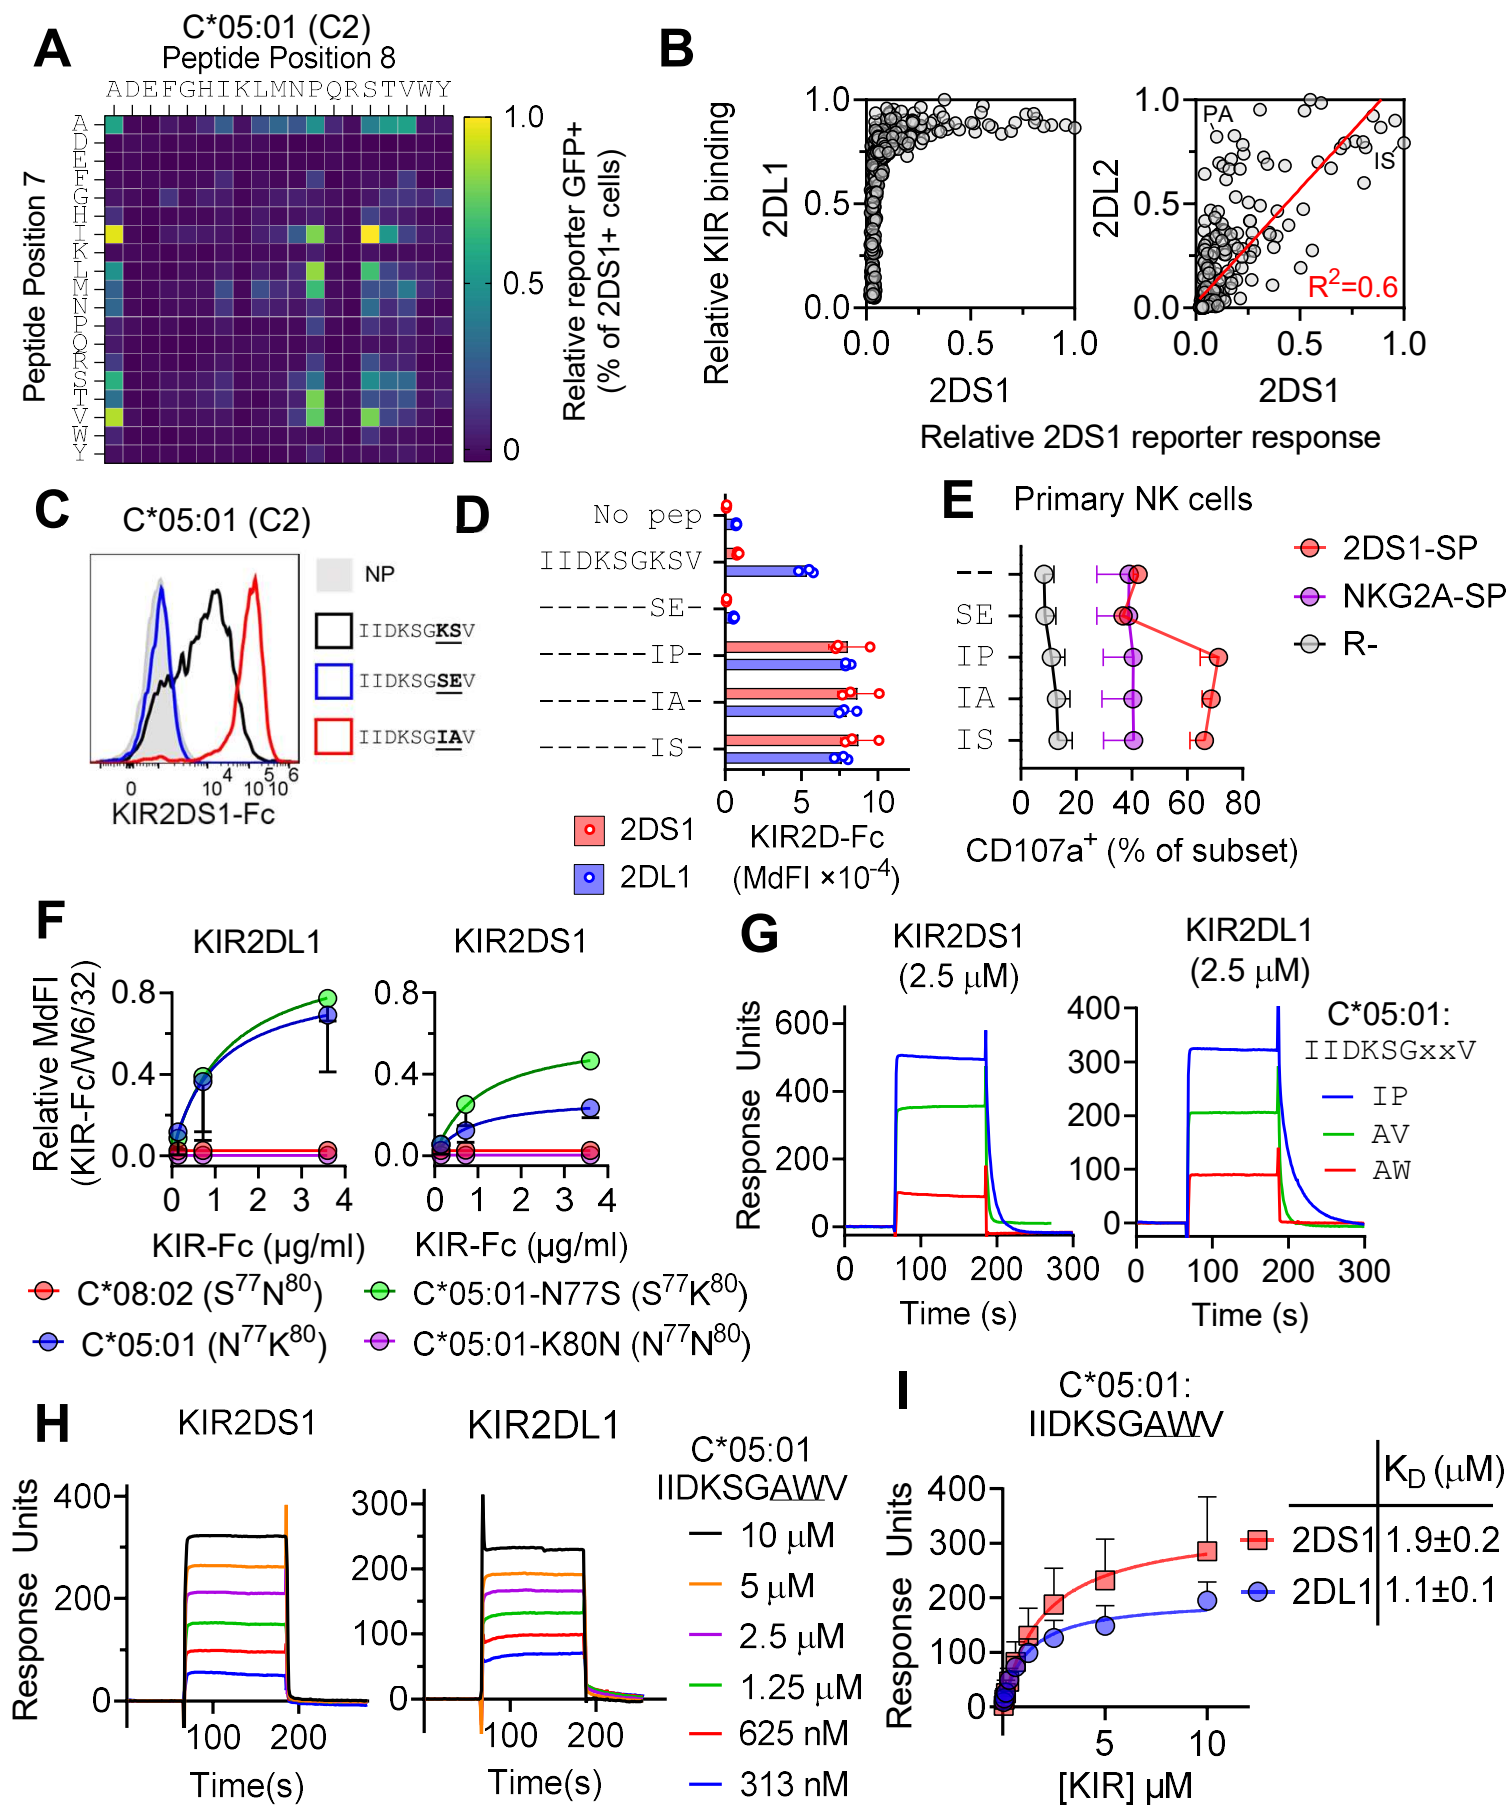

## Figure 6. Amino acid substitutions optimize peptide-specific KIR binding to HLA-C\*16:02

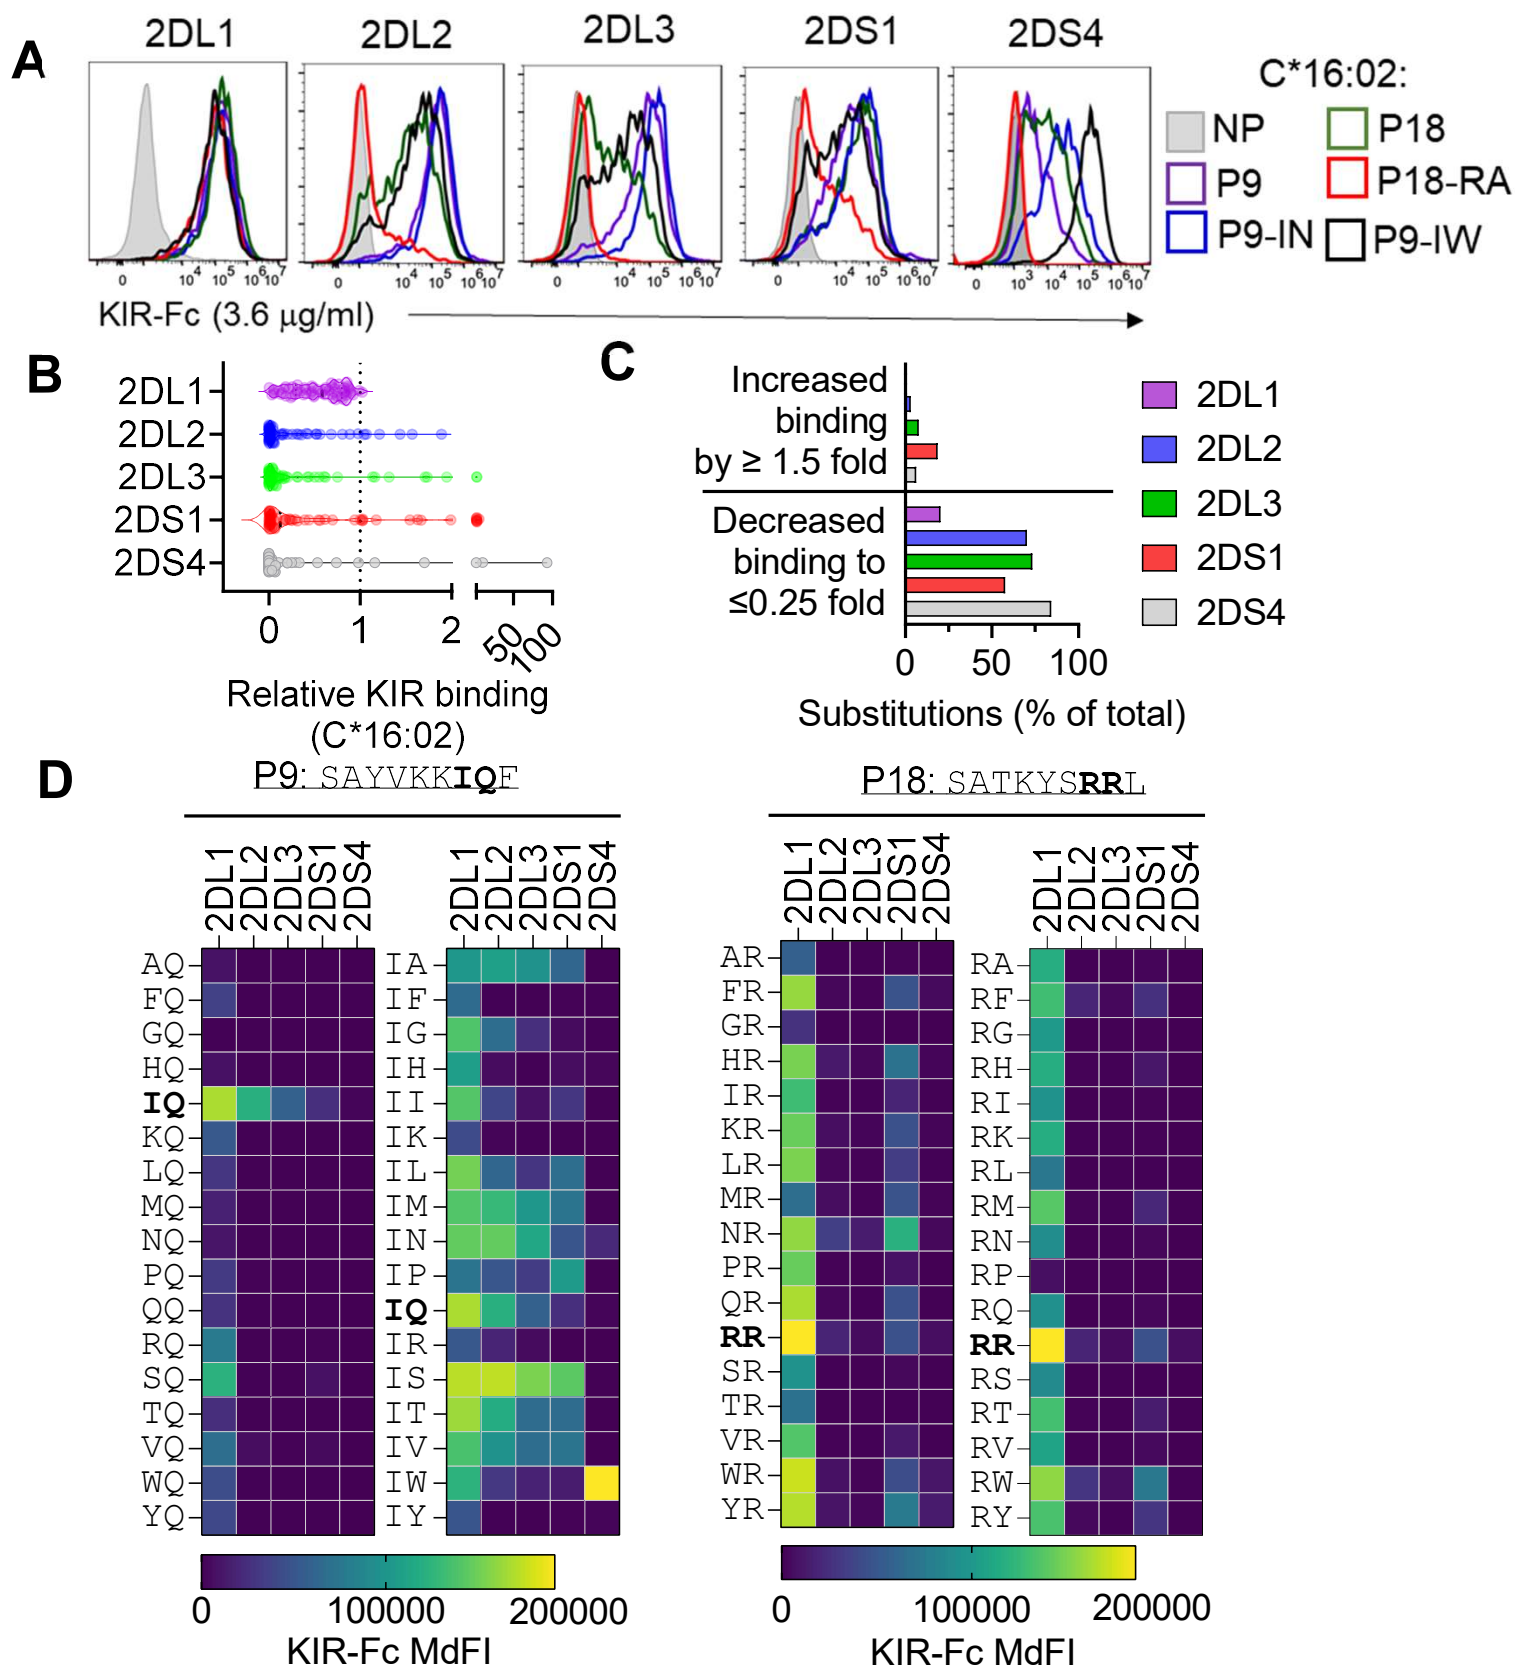

# Figure 7. KIR (2DL1, 2DL2, 2DL3, 2DS1, 2DS4) binding to different HLA-C allotypes is dependent on peptide backbone.

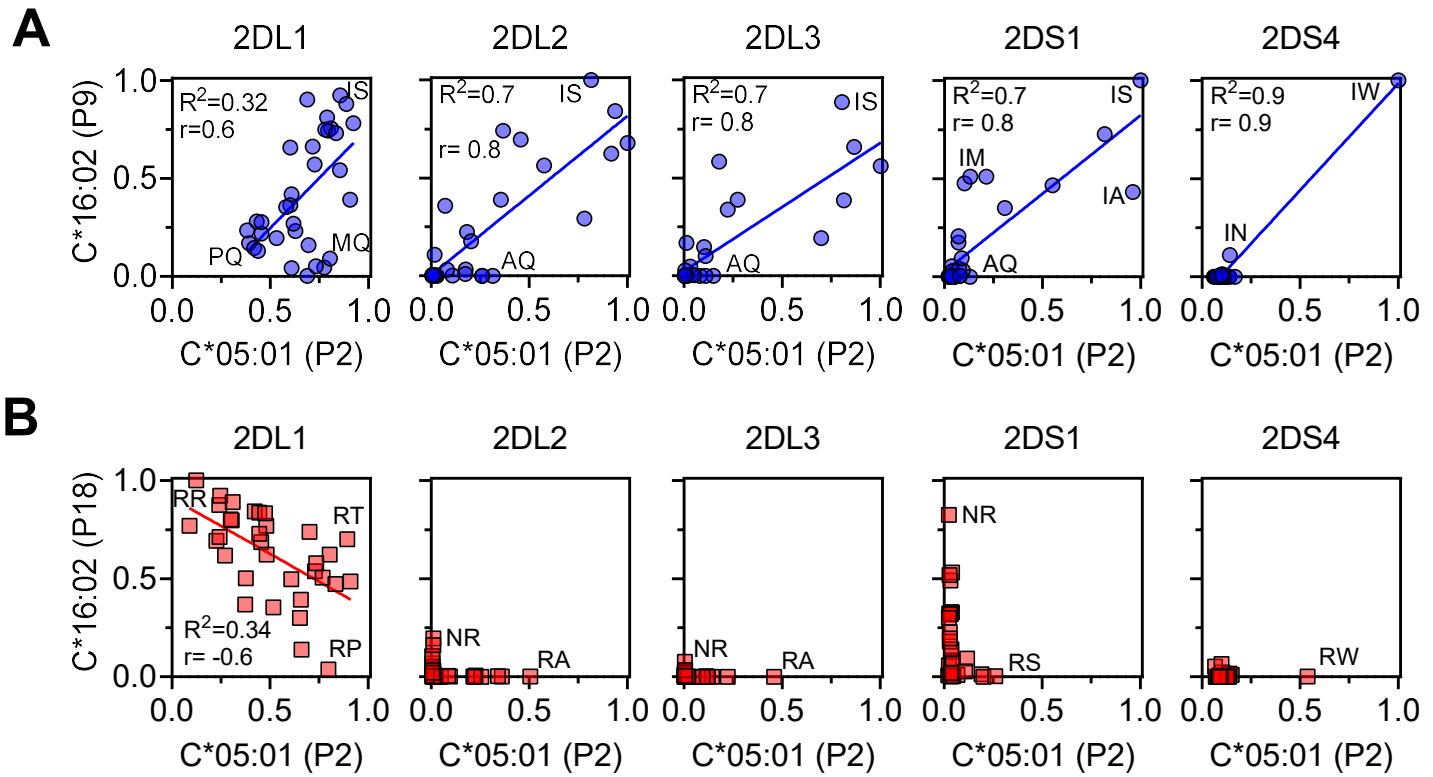

# Supplementary Figure 1 Peptide specificity of KIR2DL1, KIR2DL2 and KIR2DL3 binding to HLA-C

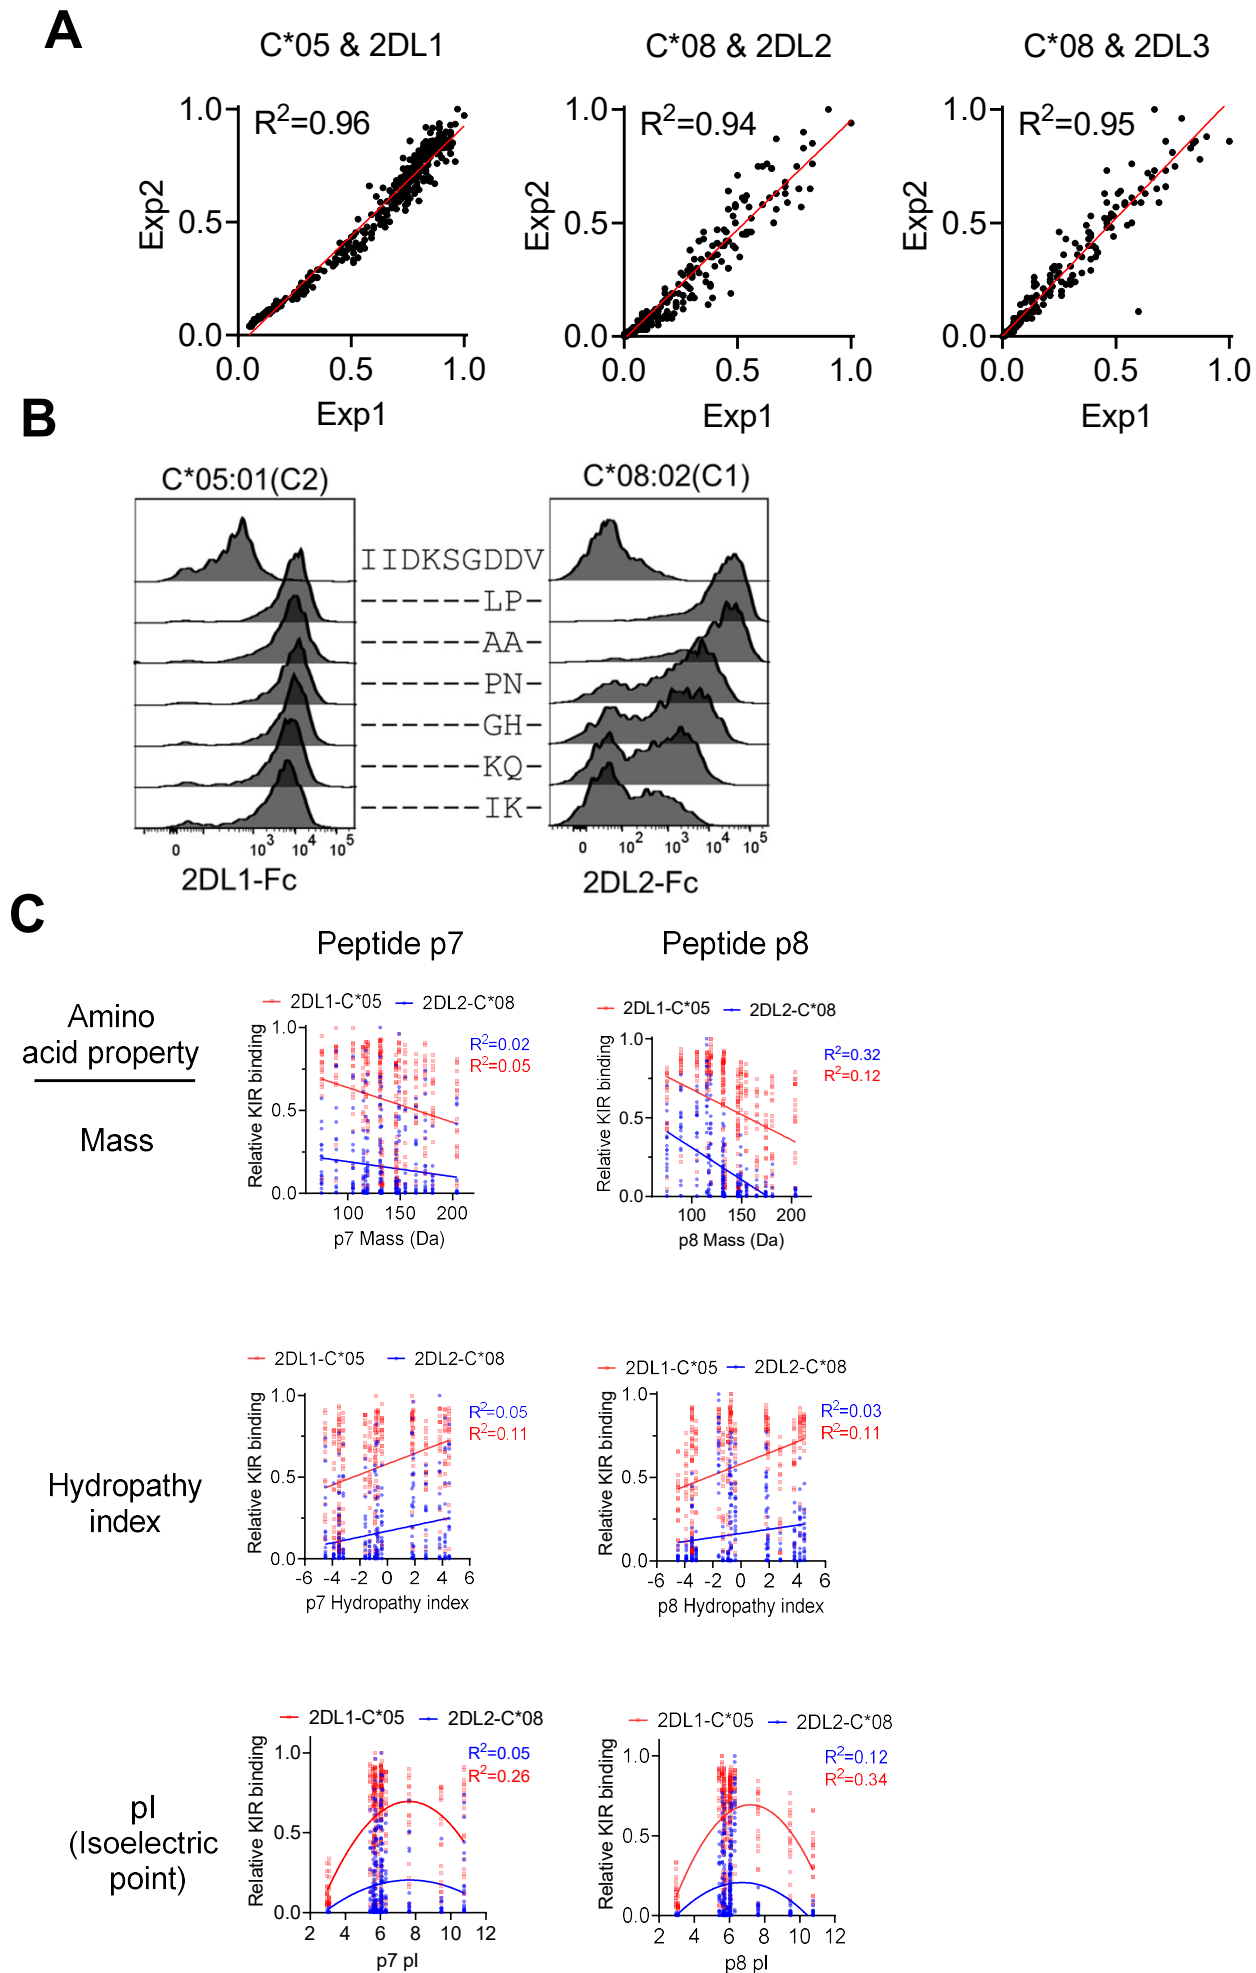



**D**

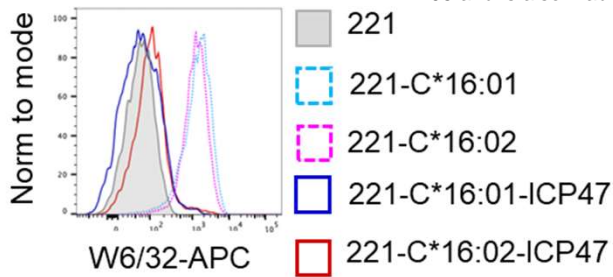

**E**

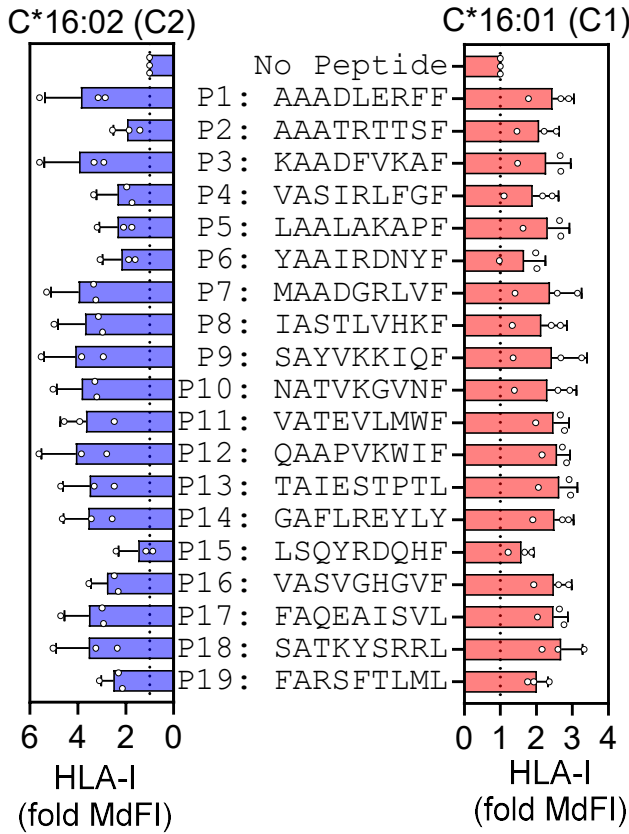

**F**

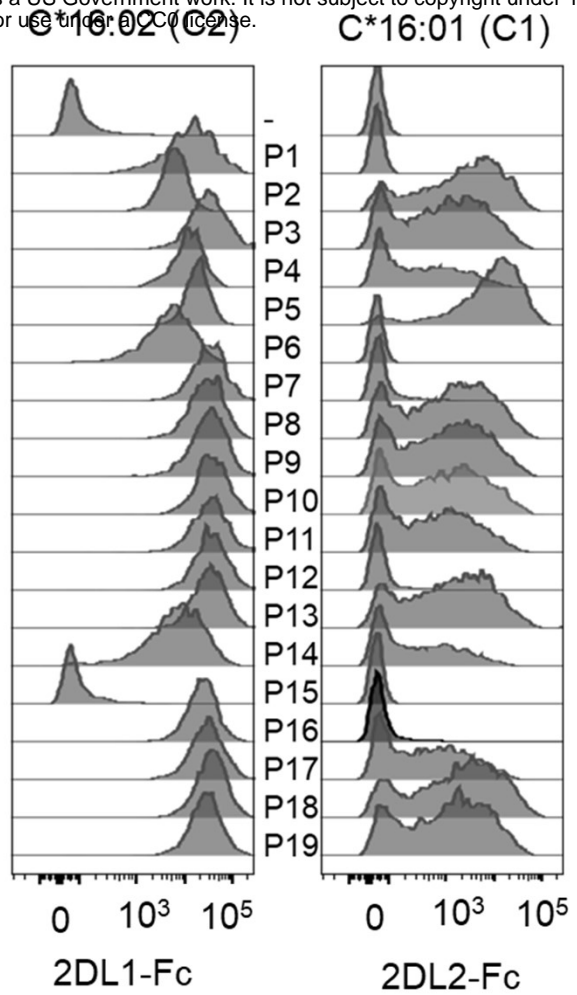

## Supplementary Figure 2. Peptide specificity of crossreactive KIR2DL1, KIR2DL2 and KIR2DL3 binding to HLA-C.

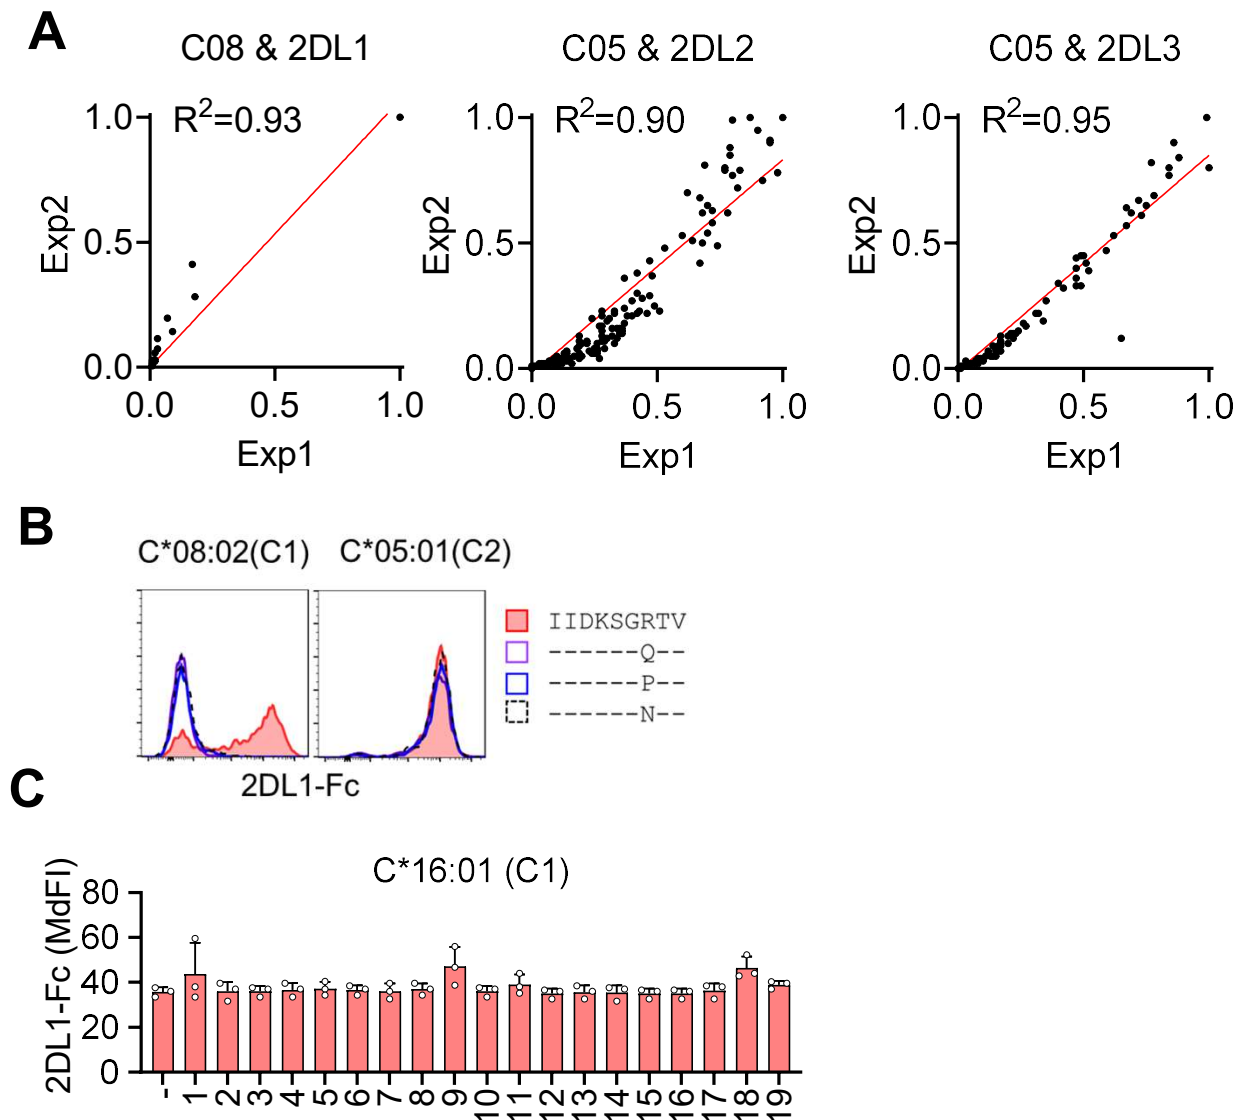

**Supplementary Figure 3. KIR2DS4 is a peptide specific receptor for C1 and C2 HLA-C.**

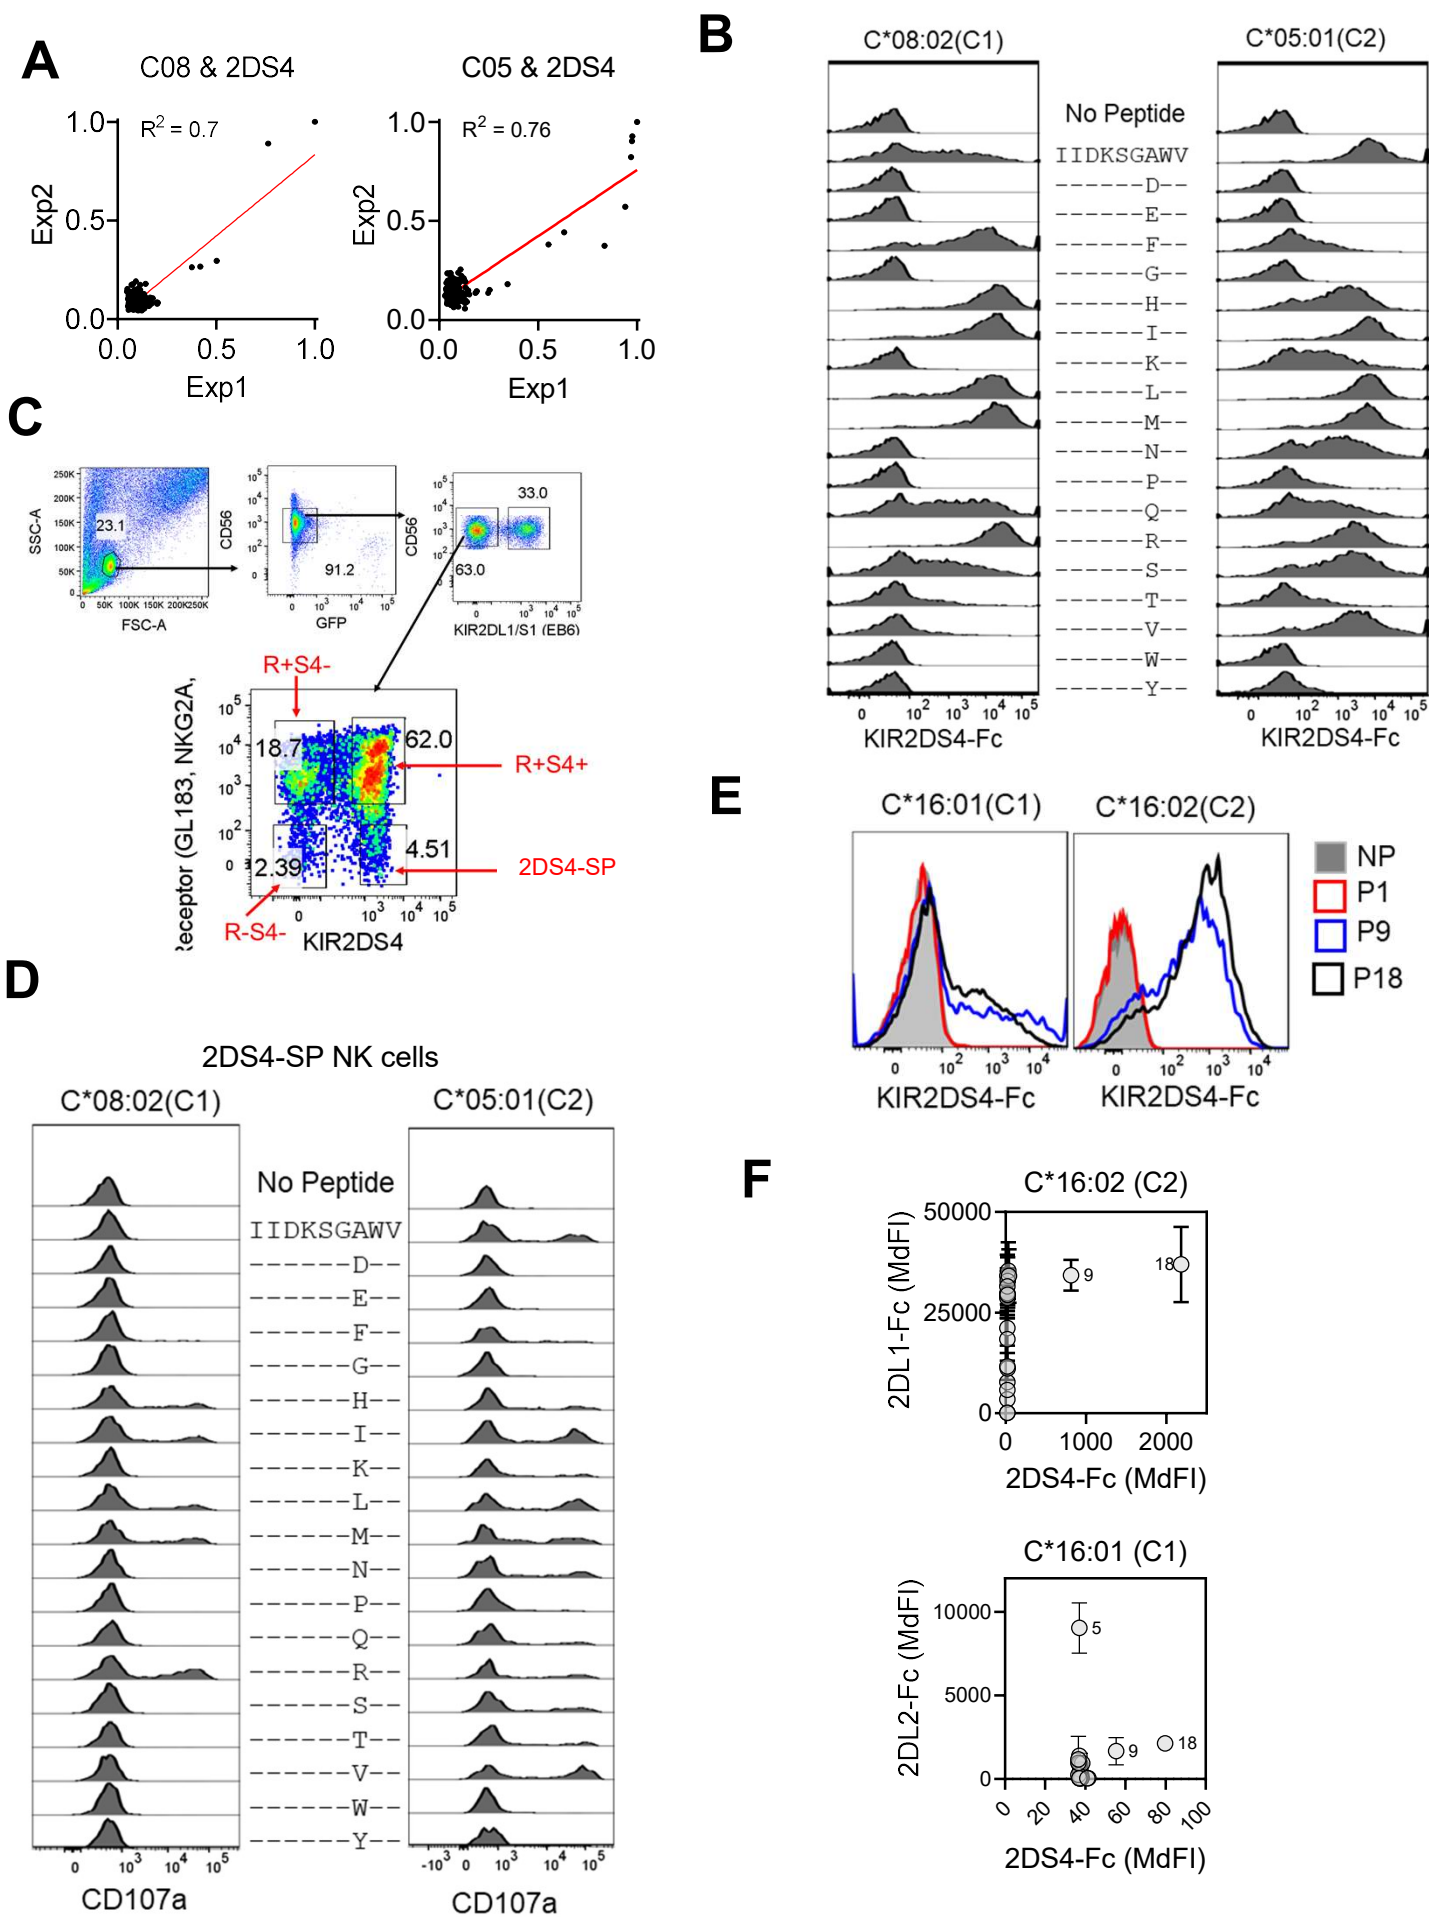

**G**

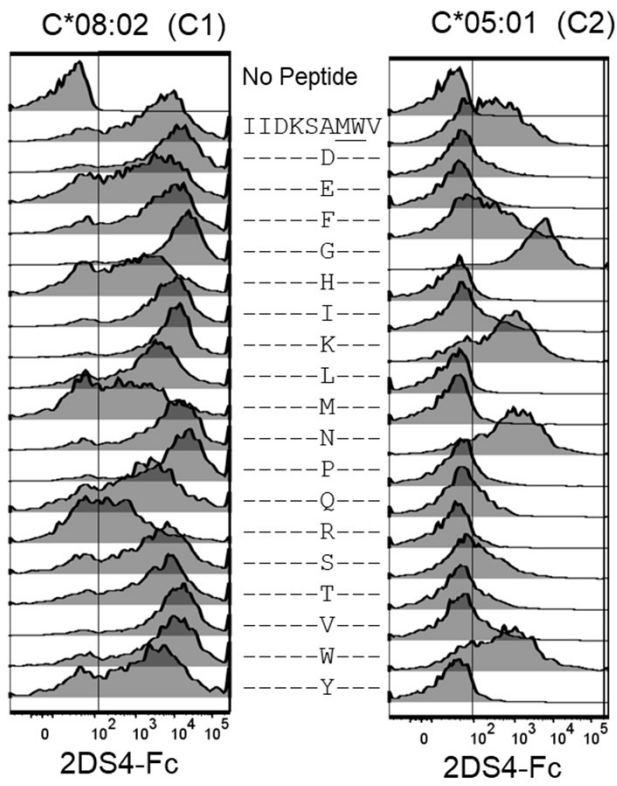

# Supplementary Figure 4. KIR2DS1 is a peptide specific receptor for C\*16:02

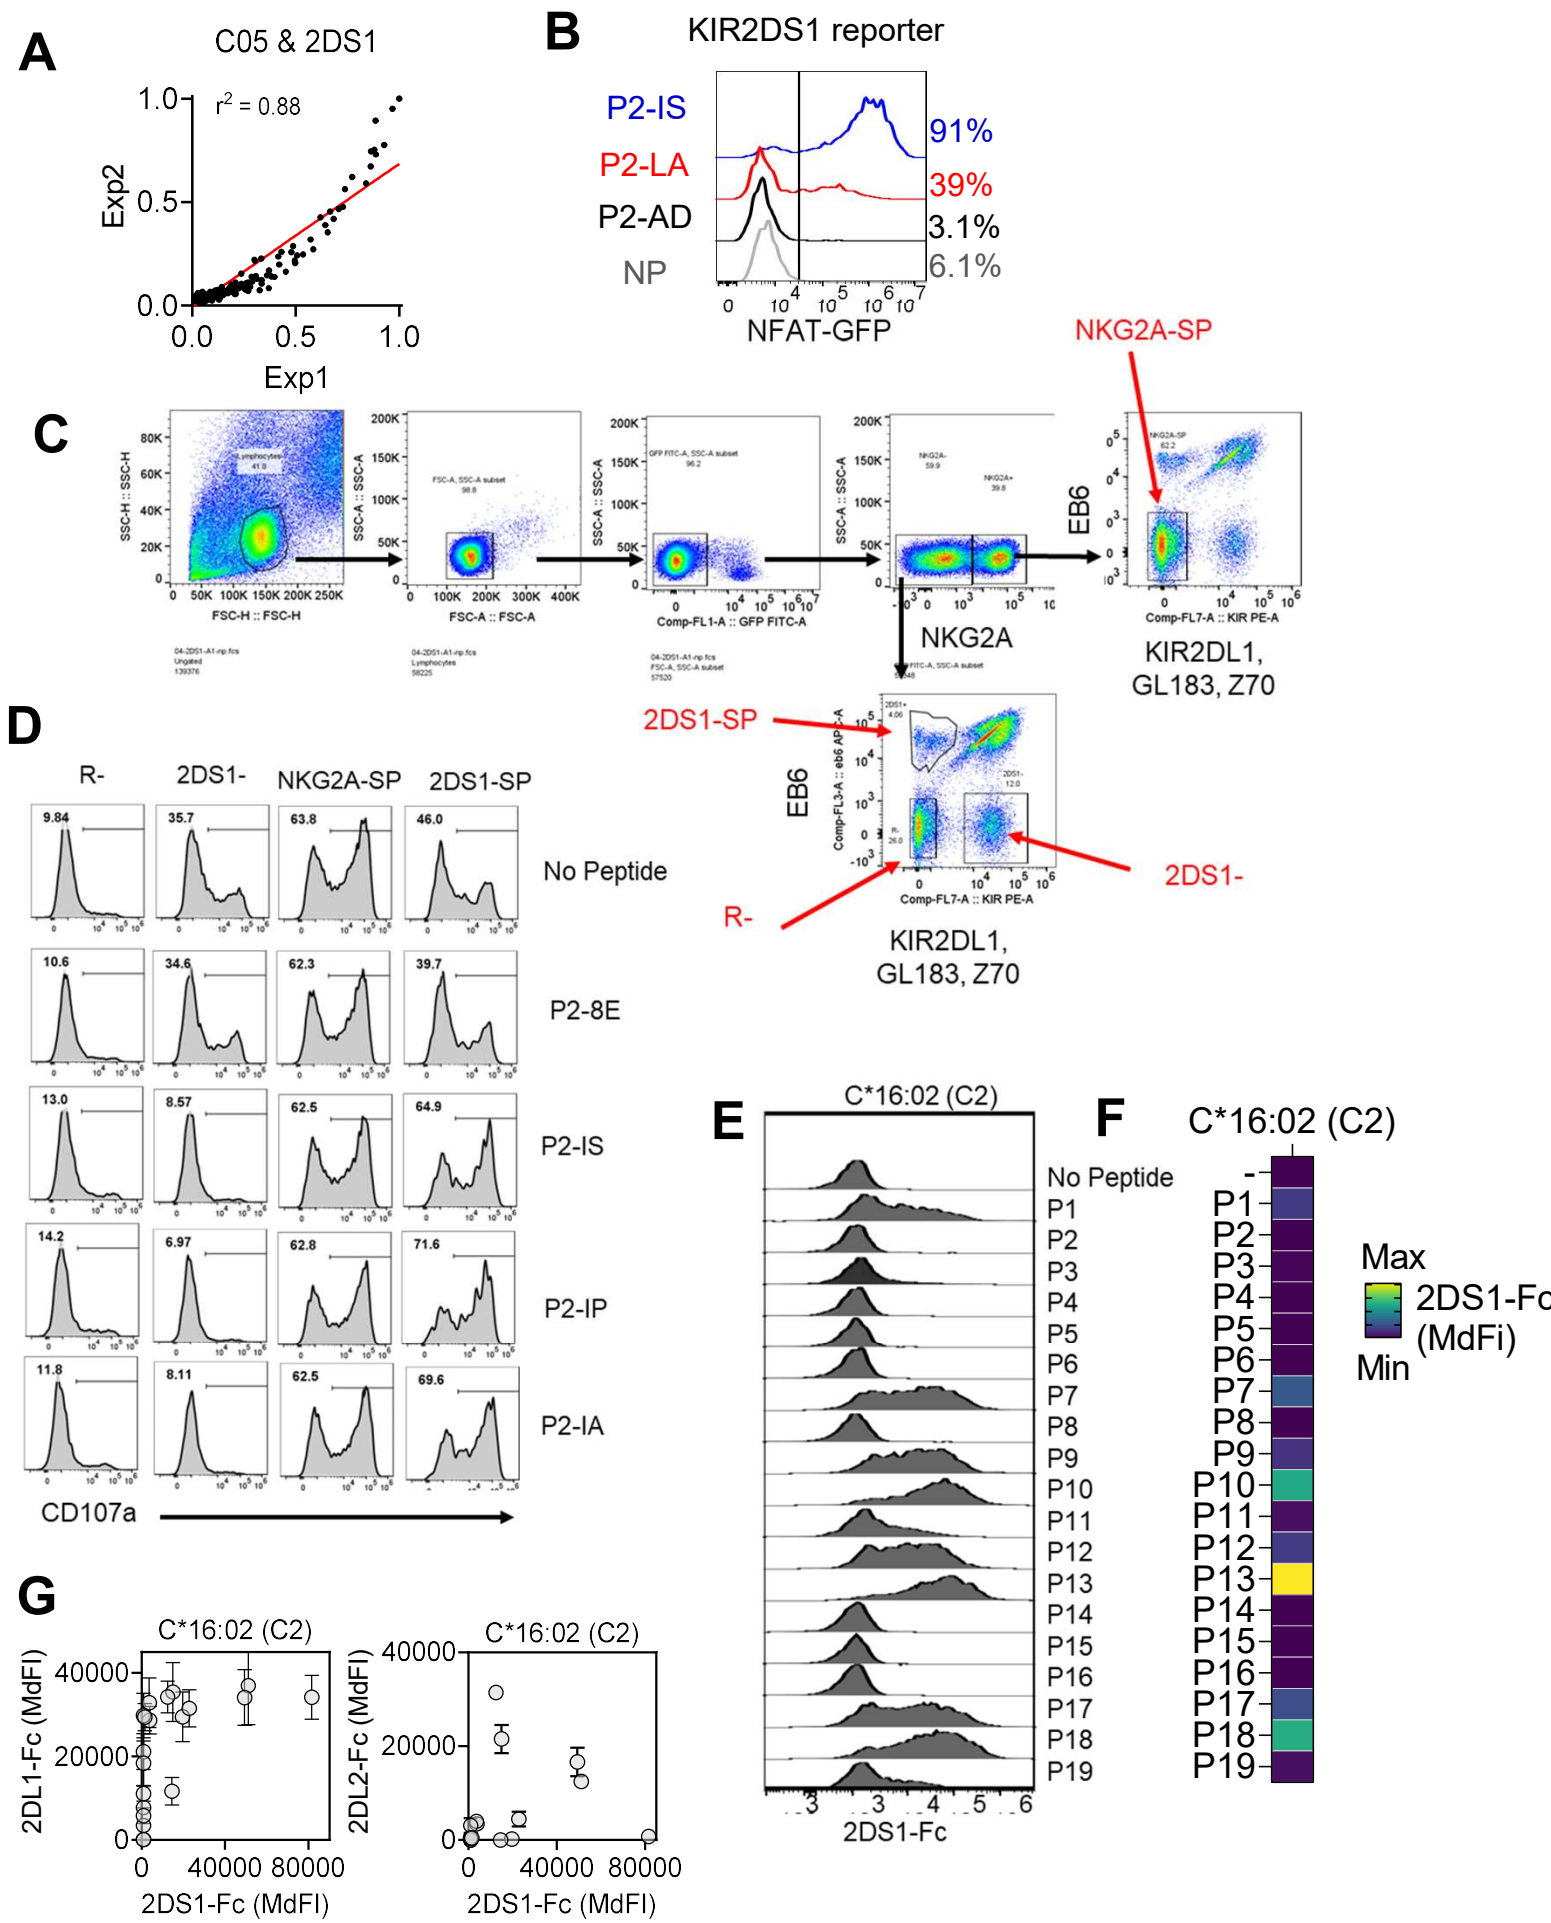

**Supplementary Figure 5. Position 7 and p8 peptide substitutions presented by C\*16:02 generate potent KIR2S4 ligands.**

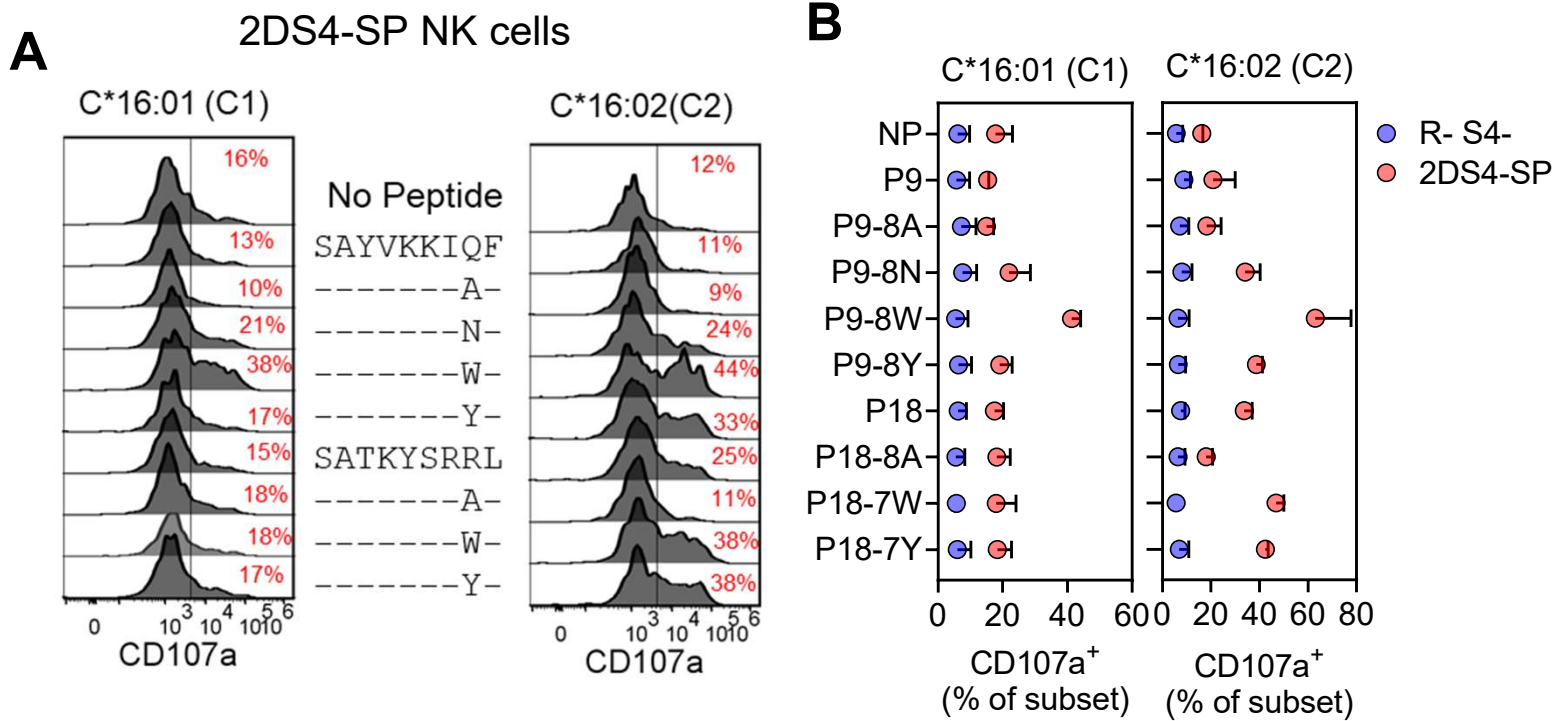

## Supplementary Figure 6. Impact of p7 and p8 substitutions in P9 and P18 on KIR2DL2 and KIR2DL3 binding to C\*16:01 (C1).

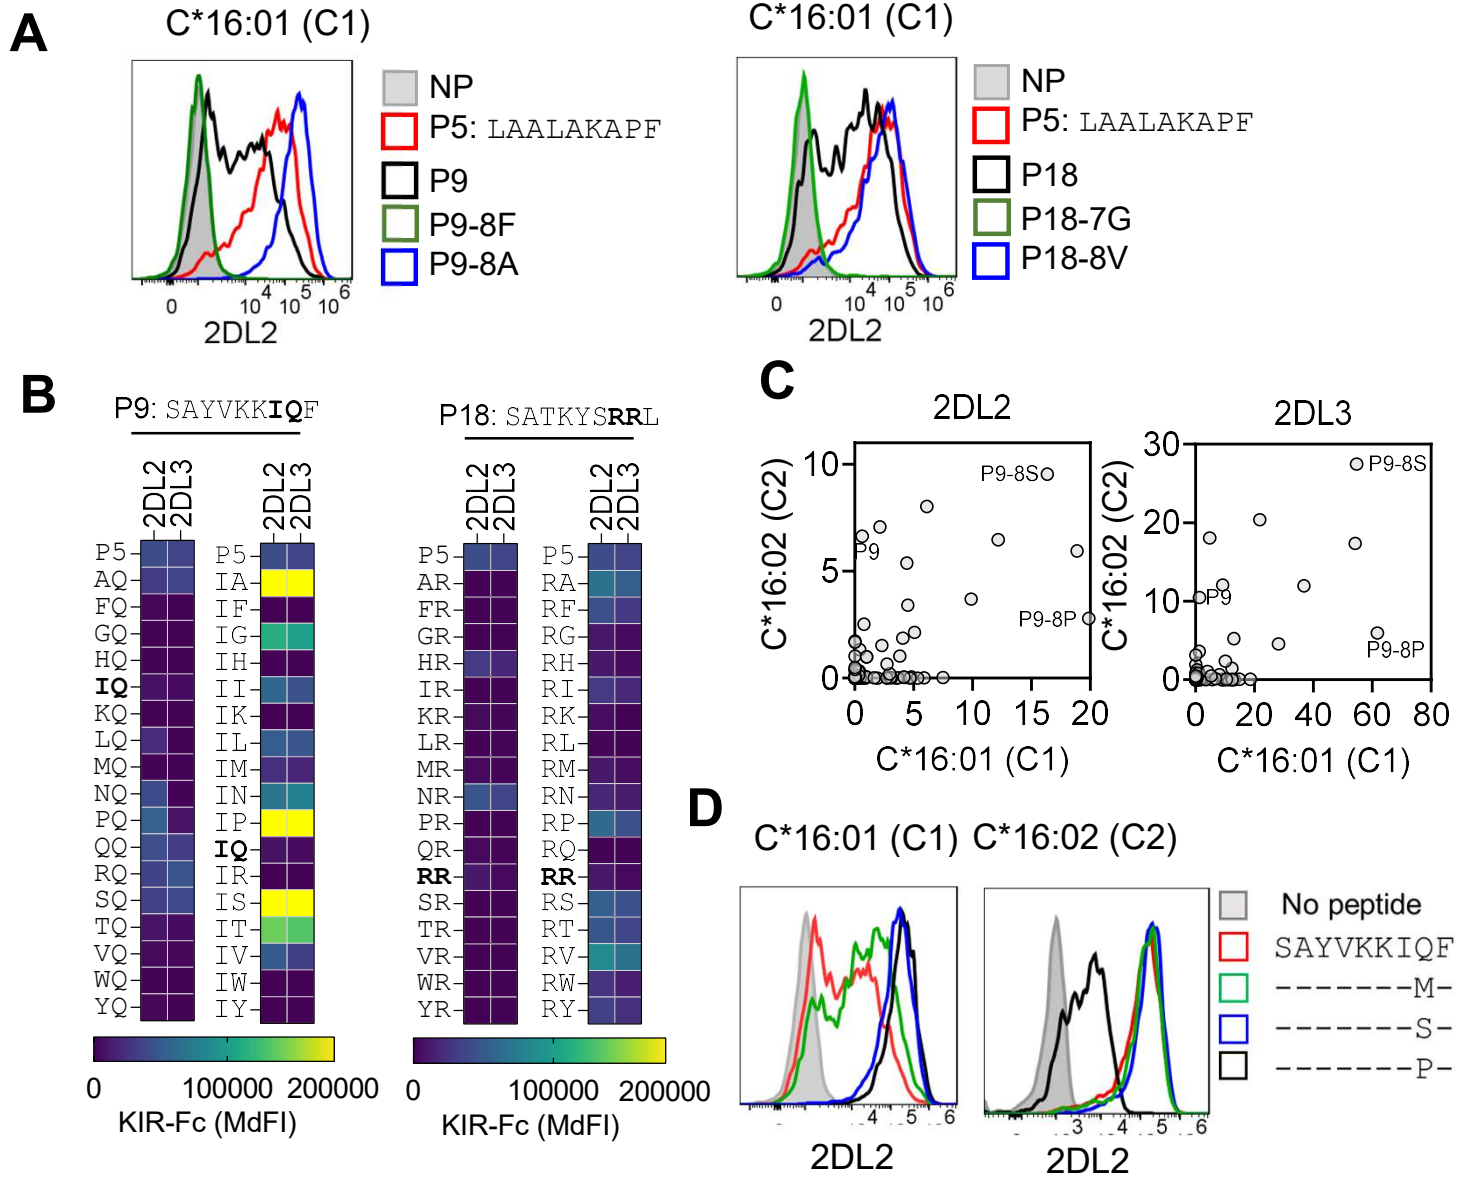

### Supplementary Figure 7. Impact of peptide backbone on 2DL2 binding to C1-HLA-C.

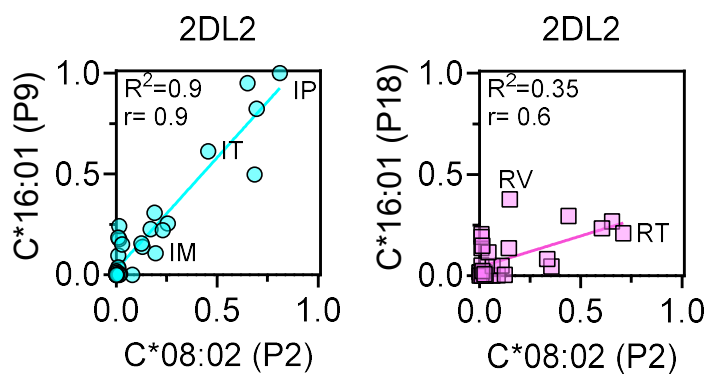

Source: https://www.biorxiv.org/content/biorxiv/early/2023/02/06/2023.02.06.527249.full.pdf
